1 **Programmable downsizing of CRISPR-Cas9 activity for precise and safe genome**  
2 **editing**

3

4 **Masaki Kawamata<sup>1\*</sup>, Hiroshi I. Suzuki<sup>2,3\*</sup>, Ryota Kimura<sup>1</sup>, Atsushi Suzuki<sup>1\*</sup>**

5

6 1. Division of Organogenesis and Regeneration, Medical Institute of Bioregulation,  
7 Kyushu University, Fukuoka, Japan.

8 2. Division of Molecular Oncology, Center for Neurological Diseases and Cancer,  
9 Nagoya University Graduate School of Medicine, Nagoya, Japan.

10 3. David H. Koch Institute for Integrative Cancer Research, Massachusetts Institute of  
11 Technology, Cambridge, MA, USA.

12

13 \*Corresponding author: Masaki Kawamata, Hiroshi I. Suzuki, and Atsushi Suzuki

14 Masaki Kawamata, Ph.D. ([kawamata@bioreg.kyushu-u.ac.jp](mailto:kawamata@bioreg.kyushu-u.ac.jp))

15 Atsushi Suzuki, Ph.D. ([suzukicks@bioreg.kyushu-u.ac.jp](mailto:suzukicks@bioreg.kyushu-u.ac.jp))

16 Division of Organogenesis and Regeneration, Medical Institute of Bioregulation, Kyushu  
17 University, 3-1-1 Maidashi, Higashi-ku, Fukuoka 812-8582, Japan. Phone: +81-92-642-  
18 6449

19 Hiroshi I. Suzuki, M.D., Ph.D. ([hisuzuki@med.nagoya-u.ac.jp](mailto:hisuzuki@med.nagoya-u.ac.jp))

20 Division of Molecular Oncology, Center for Neurological Diseases and Cancer, Nagoya  
21 University Graduate School of Medicine, 65 Tsurumai-cho, Showa-ku, Nagoya 466-8550,  
22 Japan. Phone: +81-52-741-2111

23

24 **Abstract**

25 CRSIPR-Cas9 system has opened up the avenue to efficient genome editing<sup>1-4</sup>. However,  
26 together with known off-target effects, several concerns of current CRISPR-Cas9 platform,  
27 including severe DNA damage, cytotoxicity, and large genomic alteration, have emerged  
28 in recent reports<sup>5-7</sup> and establish a formidable obstacle to precisely model allele dosage  
29 effects of disease mutations and risk variants, especially mono-allelic effects, and correct  
30 them. Here, by developing an allele-specific indel monitor system (AIMS), we demonstrate  
31 that small and simple modification of conventional single-guide RNAs (sgRNAs) enable  
32 programmable tuning of CRISPR-Cas9 activities and alleviate such adverse effects. AIMS,  
33 which visualizes various indel events in two alleles separately in living cells, is convenient  
34 and accurate to determine the *in vitro* editing efficiency and revealed frequent mosaicism  
35 during genome editing. Using AIMS, we show that adding cytosine stretches to the 5' end  
36 of conventional sgRNA efficiently reduced Cas9 activity in a length dependent manner. By  
37 combining systematic experiments and computational modeling, we established the  
38 quantitative relationships between the length of cytosine extension and multiple aspects of  
39 CRISPR-Cas9 system. In general, short cytosine extension dramatically relieves p53-  
40 dependent cytotoxicity and suppression of homology-directed repair (HDR) while  
41 relatively maintaining on-target activity. Long cytosine extension further decreases on-  
42 target activity, thereby maximizing mono-allelic editing, while conventional system  
43 typically induces bi-allelic editing. Furthermore, such downregulation of on-target activity  
44 contributes to downregulation of relative off-target activity and protection of HDR-allele  
45 from second off-target editing. Therefore, cytosine extension method finally enables both  
46 single-step generation of heterozygous single-nucleotide disease mutations from

47 homozygous states in mouse ES cells and correction of heterozygous disease mutations in  
48 human iPS cells. Taken together, our study proposes updates of standard CRISPR-Cas9  
49 platform in mammalian cells toward precise and safe genome editing in diverse  
50 applications.

51

## 52 **Introduction**

53

54 CRISPR-Cas9 system has opened up the avenue to efficient genome editing<sup>1-4</sup>. It is still  
55 challenging to model and correct most genetic variants that contribute to various diseases.  
56 Several methods such as CORRECT combine the standard CRISPR-Cas9 system and  
57 homology-directed repair (HDR) for this purpose<sup>8,9</sup>. However, they typically require  
58 introduction of silent mutations in HDR templates to protect the HDR-allele from second  
59 editing since the HDR templates are easy targets for off-target activities of Cas9, and  
60 multiple cloning steps are thus inevitable to revert silent mutations. Other approaches such  
61 as base editing (BE) or prime editing (PE) avoid DNA double-strand break (DSB)<sup>10-13</sup>, but  
62 still accompany with insertions/deletions (indels) and undesirable mutations caused by  
63 editing errors<sup>14-17</sup>. Besides known off-target effects, multiple recent studies have unveiled  
64 that several adverse effects, such as cytotoxicity with severe DNA damage, large on-target  
65 genomic deletion, and chromosomal rearrangement, are prevalent in mammalian cells<sup>5-7</sup>.  
66 Indeed, the large deletions are induced in up to 20% of cells<sup>7</sup>. Among them, the large DNA  
67 deletions are particularly underestimated in the next-generation sequencing (NGS)-based  
68 methods, which are typically used for development of CRISPR-based technologies, such  
69 as CORRECT, BE, and PE, because short read sequencing analyzes only partially matched  
70 target sequences. NGS-based methods also miss clonal and allelic editing information,  
71 including the prevalence of mosaicism. To investigate an avenue for safe genome editing,  
72 we first attempted to establish a convenient but accurate experimental platform to visualize  
73 the dynamics of genome editing in each single allele at the single cell level in living cells:  
74 allele-specific indel monitor system (AIMS).

75

## 76 **Results**

### 77 **Allele-specific indel monitor system (AIMS)**

78 An allele-specific indel monitor system (AIMS) employs insertion of the monitor cassette  
79 containing 2A self-cleaving peptides (P2A) and two distinct fluorescent proteins  
80 (tdTomato and Venus) in two alleles (Fig. 1a). Use of sgRNA targeting a P2A sequence  
81 allows us to analyze indel induction in a pair of alleles by two distinct colors in real-time  
82 and at clonal level without sequence analysis. By inserting AIMS cassette downstream of  
83 coding regions of genes, which products localize to the nuclei or cell membrane, e.g.  
84 transcription factors (TF) or membrane proteins (MP), changes in localization of two  
85 fluorescence can distinguish nine combinations consisting of in-frame indels, frameshift  
86 indels or large deletions, and no indel at each allele (Fig. 1a). For example, in-frame indels  
87 disrupt endopeptidase recognition of P2A peptides and thus result in change in fluorescence  
88 localization to nucleus or membrane. AIMS is also sensitive to large deletions, which cause  
89 loss of fluorescence. In AIMS, multiple sgRNAs can be tested using several target sites in  
90 P2A sequence and/or generating P2A variants with silent mutations (Fig. 1b). In this study,  
91 we used an original P2A sequence, named P2A<sub>1</sub><sup>18</sup>, and one of its variants, named P2A<sub>2</sub>,  
92 and tested six sgRNAs targeting P2A<sub>1</sub> or P2A<sub>2</sub> (Fig. 1b). We first developed AIMS in  
93 mouse embryonic stem cells (mESCs) by targeting T-Box transcription factor 3 (*Tbx3*) and  
94 membrane protein E-cadherin (*Cdh1*) because they are homogeneously expressed in mESCs  
95 under a 2iL culture condition<sup>19,20</sup> (Extended Data Fig. 1a). AIMS successfully  
96 distinguished various combinations and was consistent with sequence validation (Fig. 1c  
97 and Extended Data Fig. 1b, c).

98 To enhance experimental reproducibility, we mainly utilized the all-in-one  
99 plasmids expressing single-guide RNA (sgRNA), Cas9, and puromycin-resistant cassette  
100 (p:RCP), and performed AIMS analysis in cells selected by puromycin treatment (Fig. 1d).  
101 Notably, approximately 30 % of primary colonies derived from puromycin-resistant single  
102 cells exhibited mosaicism (Fig. 1d). Thus, the primary colonies were dissociated and the  
103 secondary ones with homogenous fluorescent pattern were analyzed (Fig. 1d). Bi-allelic  
104 indels were induced in more than 99.4% of mESC clones for all of six tested sgRNAs  
105 targeting P2A<sub>1</sub> or P2A<sub>2</sub> (Fig. 1e). Similar results were obtained when endogenous genes  
106 were targeted (Fig. 1f). Although the CRISPR editing efficiency is reportedly influenced  
107 by chromatin accessibility<sup>21</sup>, we confirmed high rates of bi-allelic indels for *Alb* gene, not  
108 expressed in mESCs.

109 Next, we investigated the accuracy of AIMS. When analyzing bi-allelic indel  
110 clones, allelic bias in both indel induction and frameshift/in-frame indel frequency was not  
111 evident (Fig. 1g and Extended Data Fig. 1d). Frequencies of in-frame indels were lower  
112 than those of frameshift indels or large deletions. Next, the error rates of AIMS data-based  
113 indel probability (AIMS[P]) were investigated by additional sequence analysis of the rare  
114 population of the tdTomato<sup>+</sup>/Venus<sup>indel</sup> and tdTomato<sup>indel</sup>/Venus<sup>+</sup> heterozygous clones (Fig.  
115 1h). The 86% of these ostensibly heterozygous clones were turned to be homozygous,  
116 resulting in the error frequency less than 0.3% (Fig. 1h). We next performed a standard  
117 T7E1 survey assay with a bacterial cloning process in our experiments, determined indel  
118 probability (T7E1-Bac[P]), and estimated the error rates (Fig.1i). Importantly, additional  
119 sequence analysis revealed that approximately 8% of indels were not digested by T7E1  
120 (Fig.1j), suggesting that AIMS is more accurate than T7E1 assay. Thus, combination of

121 T7E1 and sequence analysis was performed hereafter when determining bacterial cloning-  
122 based indel probability (Bac[P]). These results collectively suggest that the current  
123 CRISPR-Cas9 system basically induces bi-allelic DNA cleavage when appropriate  
124 sgRNAs are designed and Cas9-introduced cells are sufficiently selected, and that editing  
125 outcomes at each allele are stochastic and highly dynamic, leading to frequent mosaicism.  
126

### 127 **Downsizing of sgRNA-Cas9 activity by sgRNA modification**

128 Consistent with our findings, to generate heterozygous genotypes, other  
129 methods such as CORRECT have basically employed bi-allelic editing but introduced  
130 some technical approaches, such as the use of mixed HDR templates, to control editing  
131 outcomes of two alleles for heterozygosity<sup>8,9,22</sup>. We alternatively attempt to maximize  
132 mono-allelic genome editing by reducing excessive activity of conventional sgRNA-Cas9.  
133 Reducing amounts of the all-in-one plasmid or sgRNA-expressing plasmid failed to  
134 increase the clones with mono-allelic indels (Fig. 2a and Extended Data Fig. 2). Next,  
135 addition of 15-base stretches of guanine [15G], cytosine [15C], adenine [15A], and  
136 thymidine [15T] to the 5' end of spacer sites was tested on the basis of previous reports  
137 describing that a few additional guanines at the 5' end may potentially interrupt the sgRNA-  
138 Cas9 activity<sup>23,24</sup> (Fig. 2b). Importantly, among them, [15C] extension substantially  
139 increased frequency of mono-allelic indel clones (Fig. 2c). The [15T]sgRNA almost  
140 completely failed to induce indel, which might be due to loss of sgRNA expression because  
141 [15T] contained a 4xT transcription termination signal for the U6 promoter<sup>25</sup>. Thus, we  
142 focused on cytosine ([C]) extension in the subsequent experiments.

143                   We further investigated the relationships between [C] extension length and bi-  
144 /mono-allelic indel patterns by systematically generating all-in-one-plasmids expressing  
145 [0C]-[30C]-extended sgRNAs for six different sgRNA sequences (Fig. 2d and Extended  
146 Data. Fig. 3, 4). For all six sgRNAs, [C]-extended sgRNAs ([C]sgRNAs) exhibited  
147 decreased bi-allelic indels and increased mono-allelic indels in a length-dependent manner,  
148 indicating length-dependent editing suppression (Fig. 2d). Allelic bias was not observed in  
149 the case of mono-allelic indel induction (Fig. 2e and Extended Data Fig. 5a). Editing  
150 efficiency is reportedly influenced by the local genome environment and cell types, even  
151 when targeting the same sequences, as confirmed in Extended Data Fig. 5b, c, and highly  
152 depends on the target sequences. In fact, the absolute indel probabilities of [C]sgRNAs  
153 varied among several different sgRNAs (Fig. 2d and Extended Data Fig. 4a); nevertheless,  
154 in all experiments, [C] extension exerted uniform suppression effects on diverse sgRNA  
155 sequences. This effect can be explained by the assumption that [C] extension decreases the  
156 effective sgRNA-Cas9 complex in a length-dependent manner, as supported by  
157 computational modeling (Extended Data Fig. 4b, c and Methods). Accordingly, substantial  
158 effect of [C] extension on DSB induction was also confirmed by an *in vitro* cleavage assay  
159 using a fixed amount of [C]sgRNA (200 nM), Cas9 (66.7 nM), and template DNA (300  
160 ng) (Fig. 2f). In addition, downsized sgRNA-Cas9 activity by [20C]sgRNAs increased the  
161 frequency of mosaicism up to 63 %, while the frequency of mosaicism of conventional  
162 system was approximately 30% (Fig. 2g, opened bars). These findings suggest that kinetics  
163 of indel induction is delayed by [C] extension and that clonal analysis with dissociation  
164 methods is critical for downstream applications, especially when downsized sgRNA-Cas9  
165 is used.



166 We further investigated whether [C] extension allows both mono-allelic  
167 insertion (knock-in, KI) of large gene cassettes via HDR and protection of non-HDR allele  
168 from indel induction, i.e. one-step generation of HDR/WT clones (Fig. 2h and Extended  
169 Data Fig. 5d-f). Overall HDR frequency, which included HDR/indel clones, gradually  
170 decreased along with [C] extension due to the reduction in indel probability (Fig. 2h,  
171 middle panels). Although the overall HDR frequency of [30C]sgRNA was 3-fold less than  
172 that of [0C]sgRNA, the scarless HDR/WT frequency of [30C]sgRNA was 25-fold higher  
173 than that of [0C]sgRNA (Fig. 2h, right panel). These data indicate that one scarless  
174 HDR/WT clone can be theoretically obtained by picking 40 or 1.6 tdTomato-positive KI  
175 clones when using [0C] or [30C]sgRNA, respectively. Similar result was obtained in AIMS  
176 experiment, indicating that one scarless HDR/WT clone can be theoretically obtained by  
177 picking 137 or 1.9 G418-resistant KI clones when using [0C] or [25C]sgRNA, respectively  
178 (Extended Data Fig. 5d-f). Together, these findings suggest that mono-allelic HDR clones  
179 without scar on another allele can be efficiently obtained by downsizing sgRNA-Cas9  
180 activity.

181

## 182 **Computational modeling of single-cell heterogeneity of editing frequency**

183 In theory, maximum of the frequency of mono-allelic indel is 0.5 when setting  
184 the indel probably to 0.5 if homogenous cell population was assumed. However, actual  
185 frequency of mono-allelic indel ( $F(\text{Mono})$ ) was substantially lower than estimated  
186  $F(\text{Mono})$  especially around the intermediate AIMS[P] levels ( $\text{AIMS}[\text{P}] \sim 0.5$ ) (Fig. 3a, b).  
187 Thus, we considered heterogeneity in genome editing frequency at the single-cell level and  
188 computationally modeled the relationships between [C] extension and mono-allelic indel

189 based on AIMS datasets. By utilizing beta distribution and identifying the optimal setting  
190 ( $\alpha$  value of 0.715) (Extended Data Fig. 6a-d and Methods), we successfully predicted the  
191 frequencies for bi-, mono-, and no-indel that highly matched to the AIMS data (Fig. 3b, c  
192 and Extended Data Table 1). The simulation indicated that the highest frequency of mono-  
193 allelic indel induction is 30.8% when AIMS[P] is 0.392 (Fig. 3d and Extended Data Table  
194 2). In our experiments, [C] extension between 15 and 30 nucleotides is generally optimal  
195 for mono-allelic indel induction (Fig. 2d and Extended Data. Fig. 4). Using this model, we  
196 confirmed that both Bac[P] and AIMS[P] yields comparable predictions (Fig.3e) and  
197 further observed that Bac[P]-based predictions could be applied even when targeting the  
198 endogenous *Alb* gene (Fig. 3f). These results collectively suggest that heterogeneity in  
199 editing efficiency is another obstacle for efficient mono-allelic editing and that continuous  
200 fine-tuning of Cas9 activity is important to find the optimal range of Cas9 activity.

201           Next, we examined whether the frequency of compound heterozygous  
202 mutation could be predicted using a Cdh1-P2A<sub>1</sub>-AIMS (Fig. 3g). Compound heterozygous  
203 clones were obtained only with the [25C]sgRNA combination, and the frequency of 0.50  
204 (18 / 363) was almost identical to the predicted frequency of 0.36 (Fig. 3g), supporting high  
205 accuracy of the prediction.

206

### 207 **Generation of a heterozygous SNP disease model**

208           Scarless mono-allelic single nucleotide editing is the most challenging  
209 recombination because it involves a high probability of off-target cleavage against a 1 bp  
210 mismatched (1mm) HDR allele<sup>9</sup>. We adopted [C] extension method to this issue. To  
211 achieve this goal, we chose Fibrodysplasia Ossificans Progressiva (FOP) for which a

212 mono-allelic 617G > A (R206H) mutation in human *ACVR1* gene is a causal mutation<sup>26</sup>  
213 and attempted to generate the identical mutation of mouse *Acvr1* gene in wild-type  
214 (WT/WT) mESCs (Fig. 4a). A sgRNA was designed for the region crossing the G>A  
215 editing site (Fig. 4a), and indel probability reduction by [C] extension was confirmed by  
216 T7E1 and Bac[P] analysis (Fig. 4b, c). After transfection with all-in-one CRISPR plasmids  
217 and ssODN as an HDR repair template, sequence analysis was performed for individual  
218 clones and the frequencies of overall HDR and precise mono-allelic HDR (WT/R206H)  
219 were determined. The overall HDR consists of WT/R206H genotype and all other  
220 genotypes harboring indels. [0C]sgRNA induced overall HDR only in 4.1% of clones,  
221 however, the frequency of overall HDR for [5C]sgRNA went up to 20.5% and the  
222 frequency gradually decreased in parallel with the reduction in indel probability (Fig. 4d).  
223 In contrast, the frequency of precise WT/R206H HDR gradually increased with [C]  
224 extension, and all clones for [25C] and [30C]sgRNAs exhibited the correct WT/R206H  
225 genotype, while [0C]-[10C]sgRNAs could not induce the precise editing (Fig. 4d). Based  
226 on overall HDR frequency, we computationally estimated HDR rates after DNA cleavage  
227 of single allele by taking into account heterogeneity of single-cell editing efficiency (Fig.  
228 4e). This analysis clearly showed that low HDR rate (2.07 %) increases upon [C] extension  
229 and that each [C]sgRNA exhibits similarly high HDR rate (mean 10.99%) except for [25C].  
230 This suggests that [C] extension has generally recovered HDR rate presumably suppressed  
231 by conventional CRISPR-Cas9 system.

232

233 **Suppression of off-target activity by CRISPR-Cas9 downsizing**

234 In spite of general increase in HDR rates, the precise WT/R206H clones were  
235 obtained only for long [C] extension ([20C]-[30C]) but not for short [C] extension with  
236 high overall HDR frequency. We assumed that suppressing Cas9 activity makes 1-  
237 nucleotide mismatch (1mm) targets less responsive to off-target cleavage, thereby  
238 protecting HDR allele from second indel induction. As shown in Fig. 4c, the ratio of off-  
239 target editing on R206H HDR allele (1mm) to on-target editing on perfect matched (pf)  
240 WT allele decreased along with [C] extension. Since differences in editing efficiency for  
241 on-targets and off-targets reflects differences in their dissociation constants, in theory, the  
242 ratio of off-target editing to on-target editing and on-target specificity decrease and increase  
243 along with suppression of editing frequency, respectively (Extended Data Figure 7a, b and  
244 Methods). Thus, protection of HDR allele from second editing becomes remarkable upon  
245 long [C] extension. Consistently, the strong off-target inhibitory effect by [C] extension  
246 was also confirmed for other sgRNAs in HEK293T cells (Extended Data Fig. 7c, d). We  
247 further performed detailed computational modeling of various HDR outcomes based on  
248 estimated HDR rates shown in Fig. 4e (Fig. 4f-g, Extended Data Fig. 8a-f, and Methods).  
249 The predicted frequencies of overall HDR, WT/R206H HDR, and various HDR patterns  
250 were highly consistent with the experimental results (Fig. 4f-h). The optimal indel  
251 probability for the precise WT/R206H HDR was predicted to be 0.313, which was slightly  
252 lower than the optimal indel probability of 0.392 for mono-allelic indel induction,  
253 suggesting the use of [20C]sgRNA and [25C]sgRNA (Extended Data Fig. 8c).

254 Finally, we confirmed acquisition of the FOP phenotype in the WT/R206H  
255 clone by generating chimeric mice. Ectopic ossification at their contributing sites was  
256 confirmed (Fig. 4i), as reported in the previous work<sup>27</sup>.

257

## 258 **Safe and systematic precise gene correction in FOP hiPSCs**

259           We next demonstrated the R206H allele-specific gene correction by  
260 downsizing sgRNA-Cas9 activity in a FOP patient-derived human induced pluripotent  
261 stem cells (hiPSCs, WT/ R206H)<sup>28</sup> (Fig. 5a). The sgRNA was designed for the R206H (pf)  
262 allele and transfected with ssODN containing a silent mutation as a hallmark, which is  
263 necessary to distinguish an HDR-corrected (Corrected) allele from original WT allele.  
264 Otherwise, WT/- clones, in which PCR amplicons from R206H allele cannot to be obtained  
265 due to large deletions or more complex genomic rearrangement<sup>7</sup>, are misidentified as  
266 WT/Corrected ones. Efficient indel induction by [0C]sgRNA and its decrease by [5C]-  
267 [20C]sgRNAs were confirmed by a T7E1 assay (Fig. 5b). Bac[P] analysis showed that  
268 indel probabilities on the WT (1mm) allele decreased with [5C]sgRNA more potently than  
269 those on the R206H (pf) allele (Fig. 5c). As described above, the relative suppression of  
270 off-target effects is explained by the inherent effects of suppressing on-target activities  
271 (Extended Data Fig. 7). Corrected allele (2mm) is further less sensitive to second editing.

272           It is known that Cas9-mediated DSBs induce potent p53-dependent  
273 cytotoxicity in hiPSCs<sup>5,6</sup>. Indeed, severe cytotoxicity was induced by [0C]sgRNA (Fig. 5d)  
274 and p53 was highly activated in 86% of the surviving cells (Fig. 5e). In contrast, such  
275 cytotoxicity and p53 activation were dramatically relieved by the use of [5C]-  
276 [20C]sgRNAs (Fig. 5d, e). Inhibition of cytotoxicity by [C] extension was also confirmed  
277 by independent experiments targeting other genes in hiPSCs (Extended Data Fig. 9a-d),  
278 although HEK293T cells were tolerable to conventional system (Extended Data Fig. 9e-h).  
279 We next determined the frequencies of overall HDR and precise WT/Corrected HDR.

280 Overall HDR frequency with [5C]sgRNA was comparable to that of [0C]sgRNA albeit  
281 with a lower indel probability, and overall HDR frequency decreased with longer [C]  
282 extension (Fig. 5f). The precise WT/Corrected clones could be obtained by [5C]sgRNA  
283 and [10C]sgRNA, but not by [0C]sgRNA (Fig. 5f). As the result of gene correction, activin  
284 A-mediated activation of bone morphogenetic protein (BMP)-responsive Smad1/5/8 was  
285 cancelled in the WT/Corrected clone (Fig. 5g), as reported in the previous work<sup>29</sup>.

286 We performed similar computational modeling of editing outcomes (Extended  
287 Data Fig. 8a, 10a-e). The HDR rates of a single allele for [0C]sgRNA and [5C]-  
288 [15C]sgRNAs were estimated to be 13.21% and 26.93%, respectively (Fig. 5h). The  
289 predicted overall and WT/R206H HDR frequencies highly correlated with the  
290 experimental results (Fig. 5i and Extended Data Fig. 10c). The computational model  
291 estimated the frequency of all 12 possible HDR patterns, which suggested that two  
292 populations of ‘WT\_Corrected\_indel/R206H\_indel’ (fraction 12) and  
293 ‘WT\_indel/R206H\_Corrected\_indel’ (fraction 6) were dominant when indel probability  
294 was high (Extended Data Fig. 10e, upper panels), suggesting that lowering indel probability  
295 is necessary to prevent second editing and allow single-step precise editing. The optimal  
296 indel probability for the precise HDR was simulated to be 0.424, suggesting the use of  
297 [5C]sgRNA (Extended Data Fig. 10b, e).

298 Similar to the mESC data, HDR rate of [0C]sgRNA was estimated to be lower  
299 than that of [5-15C]sgRNAs (Fig. 5h). Additional HDR experiment for 3 bp replacement  
300 in HEK293T cells also showed HDR enhancement with [5C]sgRNA even though indel  
301 probability was similar between [0C] and [5C]sgRNAs (Extended Data Fig. 10f-h). Here  
302 we conclude that the precise heterozygous HDR clones can be systematically obtained by

303 downsizing sgRNA-Cas9 activity through multiple mechanisms, including enhancing  
304 mono-allelic editing, suppressing p53-dependent cytotoxicity, increasing HDR rates, and  
305 suppressing second cleavage of HDR-allele through off-target suppression (Fig. 5j).

306

## 307 **Discussion**

308 Various approaches, such as anti-Cas9 protein and small molecule inhibitor, have been  
309 demonstrated to downsize Cas9 activity<sup>14,30-36</sup>. However, their significance in precise  
310 genome editing and safety has not been well tested. Here we have established that simple  
311 modifications of sgRNAs sufficiently enable fine-tuning of sgRNA-Cas9 activity, which  
312 avoid the use of other molecules with unknown adverse effects.

313           Mono-allelic genome editing using the reduced activity of sgRNA-Cas9 is  
314 important not only for generating heterozygous mutants and precise gene correction, but  
315 also for protecting the genome from unwanted off-target mutations and cytotoxicity (Fig.  
316 5j). Notably, we clarified an inhibitory effect of [C] extension on the off-target activity on  
317 1mm targets and an enhancement of on-target specificity, although these 1 mm off-targets  
318 had the same maximum indel probability as on-targets in the conventional system.  
319 Conventional methods inevitably involve multistep editing to generate precise  
320 heterozygous clones because HDR-allele have to be protected from second off-target  
321 editing by introduction of silent mutations and the silent mutations should be re-corrected  
322 especially for non-coding regions<sup>9</sup>. On the other hand, [C] extension methods enable single  
323 step heterozygous editing by protecting HDR-allele through direct suppression of off-target  
324 effects. This would be beneficial for convenient modeling of heterozygous states of disease  
325 mutations and risk variants and investigation of their downstream effects such as allele-

326 specific epigenome and gene regulation. In our system, precise homozygous mutations can  
327 be obtained by repeated mono-allelic editing. Our finding is consistent with the context of  
328 previous studies suggesting that the increased on-target specificity of engineered Cas9s,  
329 truncated gRNAs, and gRNAs with a couple of guanine addition to the 5' end, is at least  
330 partially due to decrease in the activity of sgRNA-Cas9 complex<sup>24,37,38</sup>.

331 Another important hallmark of [C] extension is suppression of excess DNA  
332 damage and cytotoxicity, leading to enhancement of HDR. The previous work reported  
333 that p53 activation induces cytotoxicity and inhibits HDR frequency by 19-fold in hiPSCs<sup>6</sup>.  
334 We conspicuously demonstrated that even short [C] extension such as [5C]sgRNA had  
335 strong potential to reduce p53 activation, enhance cell viability, and HDR rates, while  
336 maintaining maximum on-target activity. Thus, to avoid any long-term deleterious effects  
337 of excessive DNA damage on cell phenotypes, it may be reasonable to consider the use of  
338 sgRNAs with short [C] extension, such as [5C]sgRNA, as the next-generation CRISPR-  
339 Cas9 platform for diverse applications in mammalian cells. Furthermore, tunable  
340 downsizing of Cas9 activity, presented in this study, offers a systematic and safeguard  
341 platform for switchable use of bi-allelic and mono-allelic genome editing.

342



343 **Main References**

344

- 345 1 Jinek, M. *et al.* A programmable dual-RNA-guided DNA endonuclease in adaptive  
346 bacterial immunity. *Science* **337**, 816-821, doi:10.1126/science.1225829 (2012).
- 347 2 Cong, L. *et al.* Multiplex genome engineering using CRISPR/Cas systems. *Science*  
348 **339**, 819-823, doi:10.1126/science.1231143 (2013).
- 349 3 Mali, P. *et al.* RNA-guided human genome engineering via Cas9. *Science* **339**, 823-  
350 826, doi:10.1126/science.1232033 (2013).
- 351 4 Cho, S. W., Kim, S., Kim, J. M. & Kim, J. S. Targeted genome engineering in  
352 human cells with the Cas9 RNA-guided endonuclease. *Nat Biotechnol* **31**, 230-232,  
353 doi:10.1038/nbt.2507 (2013).
- 354 5 Haapaniemi, E., Botla, S., Persson, J., Schmierer, B. & Taipale, J. CRISPR-Cas9  
355 genome editing induces a p53-mediated DNA damage response. *Nat Med* **24**, 927-  
356 930, doi:10.1038/s41591-018-0049-z (2018).
- 357 6 Ihry, R. J. *et al.* p53 inhibits CRISPR-Cas9 engineering in human pluripotent stem  
358 cells. *Nat Med* **24**, 939-946, doi:10.1038/s41591-018-0050-6 (2018).
- 359 7 Kosicki, M., Tomberg, K. & Bradley, A. Repair of double-strand breaks induced  
360 by CRISPR-Cas9 leads to large deletions and complex rearrangements. *Nat*  
361 *Biotechnol* **36**, 765-771, doi:10.1038/nbt.4192 (2018).
- 362 8 Soldner, F. *et al.* Parkinson-associated risk variant in distal enhancer of alpha-  
363 synuclein modulates target gene expression. *Nature* **533**, 95-99,  
364 doi:10.1038/nature17939 (2016).
- 365 9 Paquet, D. *et al.* Efficient introduction of specific homozygous and heterozygous  
366 mutations using CRISPR/Cas9. *Nature* **533**, 125-129, doi:10.1038/nature17664  
367 (2016).
- 368 10 Komor, A. C., Kim, Y. B., Packer, M. S., Zuris, J. A. & Liu, D. R. Programmable  
369 editing of a target base in genomic DNA without double-stranded DNA cleavage.  
370 *Nature* **533**, 420-424, doi:10.1038/nature17946 (2016).
- 371 11 Nishida, K. *et al.* Targeted nucleotide editing using hybrid prokaryotic and  
372 vertebrate adaptive immune systems. *Science* **353**, doi:10.1126/science.aaf8729  
373 (2016).
- 374 12 Gaudelli, N. M. *et al.* Programmable base editing of A\*T to G\*C in genomic DNA  
375 without DNA cleavage. *Nature* **551**, 464-471, doi:10.1038/nature24644 (2017).
- 376 13 Anzalone, A. V. *et al.* Search-and-replace genome editing without double-strand  
377 breaks or donor DNA. *Nature* **576**, 149-157, doi:10.1038/s41586-019-1711-4  
378 (2019).
- 379 14 Lee, H. K. *et al.* Targeting fidelity of adenine and cytosine base editors in mouse  
380 embryos. *Nat Commun* **9**, 4804, doi:10.1038/s41467-018-07322-7 (2018).
- 381 15 Kim, H. S., Jeong, Y. K., Hur, J. K., Kim, J. S. & Bae, S. Adenine base editors  
382 catalyze cytosine conversions in human cells. *Nat Biotechnol* **37**, 1145-1148,  
383 doi:10.1038/s41587-019-0254-4 (2019).
- 384 16 Lin, Q. *et al.* Prime genome editing in rice and wheat. *Nat Biotechnol* **38**, 582-585,  
385 doi:10.1038/s41587-020-0455-x (2020).

- 386 17 Liu, Y. *et al.* Efficient generation of mouse models with the prime editing system.  
387 *Cell Discov* **6**, 27, doi:10.1038/s41421-020-0165-z (2020).
- 388 18 Kim, J. H. *et al.* High cleavage efficiency of a 2A peptide derived from porcine  
389 teschovirus-1 in human cell lines, zebrafish and mice. *PLoS One* **6**, e18556,  
390 doi:10.1371/journal.pone.0018556 (2011).
- 391 19 Russell, R. *et al.* A Dynamic Role of TBX3 in the Pluripotency Circuitry. *Stem Cell*  
392 *Reports* **5**, 1155-1170, doi:10.1016/j.stemcr.2015.11.003 (2015).
- 393 20 Pieters, T. *et al.* p120 Catenin-Mediated Stabilization of E-Cadherin Is Essential  
394 for Primitive Endoderm Specification. *PLoS Genet* **12**, e1006243,  
395 doi:10.1371/journal.pgen.1006243 (2016).
- 396 21 Chari, R., Mali, P., Moosburner, M. & Church, G. M. Unraveling CRISPR-Cas9  
397 genome engineering parameters via a library-on-library approach. *Nat Methods* **12**,  
398 823-826, doi:10.1038/nmeth.3473 (2015).
- 399 22 Maurissen, T. L. & Woltjen, K. Synergistic gene editing in human iPS cells via cell  
400 cycle and DNA repair modulation. *Nat Commun* **11**, 2876, doi:10.1038/s41467-  
401 020-16643-5 (2020).
- 402 23 Cho, S. W. *et al.* Analysis of off-target effects of CRISPR/Cas-derived RNA-  
403 guided endonucleases and nickases. *Genome Res* **24**, 132-141,  
404 doi:10.1101/gr.162339.113 (2014).
- 405 24 Mullally, G. *et al.* 5' modifications to CRISPR-Cas9 gRNA can change the  
406 dynamics and size of R-loops and inhibit DNA cleavage. *Nucleic Acids Res* **48**,  
407 6811-6823, doi:10.1093/nar/gkaa477 (2020).
- 408 25 Arimbasseri, A. G., Rijal, K. & Maraia, R. J. Transcription termination by the  
409 eukaryotic RNA polymerase III. *Biochim Biophys Acta* **1829**, 318-330,  
410 doi:10.1016/j.bbagr.2012.10.006 (2013).
- 411 26 Shore, E. M. *et al.* A recurrent mutation in the BMP type I receptor ACVR1 causes  
412 inherited and sporadic fibrodysplasia ossificans progressiva. *Nat Genet* **38**, 525-  
413 527, doi:10.1038/ng1783 (2006).
- 414 27 Chakkalakal, S. A. *et al.* An Acvr1 R206H knock-in mouse has fibrodysplasia  
415 ossificans progressiva. *J Bone Miner Res* **27**, 1746-1756, doi:10.1002/jbmr.1637  
416 (2012).
- 417 28 Matsumoto, Y. *et al.* Induced pluripotent stem cells from patients with human  
418 fibrodysplasia ossificans progressiva show increased mineralization and cartilage  
419 formation. *Orphanet J Rare Dis* **8**, 190, doi:10.1186/1750-1172-8-190 (2013).
- 420 29 Hino, K. *et al.* Neofunction of ACVR1 in fibrodysplasia ossificans progressiva.  
421 *Proc Natl Acad Sci U S A* **112**, 15438-15443, doi:10.1073/pnas.1510540112  
422 (2015).
- 423 30 Pawluk, A. *et al.* Naturally Occurring Off-Switches for CRISPR-Cas9. *Cell* **167**,  
424 1829-1838 e1829, doi:10.1016/j.cell.2016.11.017 (2016).
- 425 31 Harrington, L. B. *et al.* A Broad-Spectrum Inhibitor of CRISPR-Cas9. *Cell* **170**,  
426 1224-1233 e1215, doi:10.1016/j.cell.2017.07.037 (2017).
- 427 32 Rauch, B. J. *et al.* Inhibition of CRISPR-Cas9 with Bacteriophage Proteins. *Cell*  
428 **168**, 150-158 e110, doi:10.1016/j.cell.2016.12.009 (2017).
- 429 33 Bubeck, F. *et al.* Engineered anti-CRISPR proteins for optogenetic control of  
430 CRISPR-Cas9. *Nat Methods* **15**, 924-927, doi:10.1038/s41592-018-0178-9 (2018).

- 431 34 Hynes, A. P. *et al.* Widespread anti-CRISPR proteins in virulent bacteriophages  
432 inhibit a range of Cas9 proteins. *Nat Commun* **9**, 2919, doi:10.1038/s41467-018-  
433 05092-w (2018).
- 434 35 Jiang, F. *et al.* Temperature-Responsive Competitive Inhibition of CRISPR-Cas9.  
435 *Mol Cell* **73**, 601-610 e605, doi:10.1016/j.molcel.2018.11.016 (2019).
- 436 36 Maji, B. *et al.* A High-Throughput Platform to Identify Small-Molecule Inhibitors  
437 of CRISPR-Cas9. *Cell* **177**, 1067-1079 e1019, doi:10.1016/j.cell.2019.04.009  
438 (2019).
- 439 37 Singh, D. *et al.* Mechanisms of improved specificity of engineered Cas9s revealed  
440 by single-molecule FRET analysis. *Nat Struct Mol Biol* **25**, 347-354,  
441 doi:10.1038/s41594-018-0051-7 (2018).
- 442 38 Okafor, I. C. *et al.* Single molecule analysis of effects of non-canonical guide RNAs  
443 and specificity-enhancing mutations on Cas9-induced DNA unwinding. *Nucleic  
444 Acids Res* **47**, 11880-11888, doi:10.1093/nar/gkz1058 (2019).  
445

446 **Methods**

447

448 **Cell culture**

449 mESCs were cultured in 2iL medium containing DMEM (Nacalai Tesque) with 2 mM  
450 Glutamax (Nacalai Tesque), 1 × non-essential amino acids (NEAA) (Nacalai Tesque), 1  
451 mM Sodium Pyruvate (Nacalai Tesque), 100 U/ml penicillin, 100 µg/ml streptomycin (P/S)  
452 (Nacalai Tesque), 0.1 mM 2-mercaptoethanol (SIGMA) and 15% fetal bovine serum (FBS)  
453 (GIBCO), supplemented with 0.2 µM PD0325901 (SIGMA), 3 µM CHIR99021 (Cayman)  
454 and 1,000 U/ml recombinant mouse LIF (Millipore)<sup>39</sup>. Higher concentration of PD0325901  
455 at 1 µM was also used for 2iL medium. mESC colonies were dissociated with trypsin  
456 (Nacalai Tesque) and plated on gelatin-coated dishes. Y-27632 (10 µM, SIGMA) was  
457 added when cells were passed. hiPSCs were cultured in mTeSR Plus medium (VERITAS).  
458 hiPSC colonies were dissociated with Accutase (Nacalai Tesque) and plated on matrigel-  
459 coated dishes (matrigel, CORNING, 3/250 dilution with DMEM). Y-27632 and 1% FBS  
460 were added when cells were passed. WT hiPSCs (409B2, HPS0076) were provided by the  
461 RIKEN BRC<sup>40</sup>. FOP hiPSCs (HPS0376) were provided by the RIKEN BRC through the  
462 National BioResource Project of the MEXT/AMED, Japan<sup>28</sup>. The study using hiPSCs was  
463 approved by the Kyushu University Institutional Review Board for Human Genome/Gene  
464 Research. HEK293T cells and mouse embryonic fibroblasts (MEFs) were cultured in 10%  
465 FBS medium containing DMEM, 2 mM l-glutamine (Nacalai Tesque), 100 U/ml penicillin,  
466 100 µg/ml streptomycin (P/S) (Nacalai Tesque) and 10% FBS. Cells were maintained at  
467 37 °C with 5% CO<sub>2</sub>.

468

469 **Animals**

470 C57BL/6 mice (Clea Japan, Tokyo, Japan), ICR mice (Clea Japan, Tokyo, Japan) and  
471 *R26R<sup>YFP/YFP</sup>* mice<sup>41</sup> (a gift from Frank Costantini, Columbia University, New York, NY)  
472 were used in the present study. The experiments were approved by the Kyushu University  
473 Animal Experiment Committee, and the care and use of the animals were performed in  
474 accordance with institutional guidelines.

475

476 **Oligo nucleotides**

477 All primers, spacer linkers, and ssODNs used in the present study are listed in the Extended  
478 Data Table 3.

479

480 **Establishing mESCs**

481 Mouse ES cell lines of B6-5-2 and B6-D2-4 line were established from E3.5 blastocysts of  
482 C57BL/6 strain using 2iL or t2iL medium, respectively, and a mESC line of *R26R<sup>YFP/+</sup>*  
483 mouse strain was established using t2iL medium. Blastocysts were placed on feeders  
484 (mitomycin C-treated MEFs) after removing zona pellucida. Outgrowths of the inner cell  
485 mass (passage number 0, p0) were dissociated with trypsin and plated on gelatin-coated  
486 plate (p1). After domed colonies were grown, they were dissociated and passed (p2). The  
487 mESC lines were generated by repeating this procedure.

488

489 **Generation of AIMS**

490 Knock-in (KI) template plasmids for Cdh1-AIMS were generated by attaching 5' and 3'  
491 arms to plasmids containing P2A<sub>1</sub>:Venus or P2A<sub>1</sub>:tdTomato cassettes. The P2A<sub>1</sub> is

492 identical to a P2A sequence which is generally used<sup>18</sup>. The 5' arm was designed so that the  
493 coding end is fused to the P2A sequence in-frame to allow the production of both E-  
494 cadherin (CDH1) and the fluorescence protein independently. The KI plasmids for Tbx3-  
495 AIMS were constructed using the same strategy. The alternative P2A sequence P2A<sub>2</sub> was  
496 constructed by introducing silent mutations to each codon of the original P2A sequence.  
497 Conventional CRISPR-Cas9 system was used to efficiently knock-in the dual color  
498 plasmids in a pair of alleles. A spacer linker was designed to induce DSB downstream of  
499 the stop codon, and was inserted into *BpiI* sites of a pSpCas9(BB)-2A-Puro (PX459) V2.0  
500 plasmid (Addgene, Plasmid #62988). All sgRNAs used in the present study were designed  
501 using CRISPR DESIGN (<http://crispr.mit.edu/>) or CRISPOR (<http://crispor.tefor.net>).

502 Both the constructed all-in-one CRISPR plasmids and dual colored KI  
503 plasmids were co-transfected into the mESCs using lipofectamine 3000 (Thermo Fisher  
504 Scientific). Dissociated mESCs were plated on gelatin-coated 24-well plates with 500  $\mu$ l  
505 of (t)2iL+Y-27632 medium ((t)2iL+Y). Nucleic acid-Lipofectamine 3000 complexes were  
506 prepared according to the standard Lipofectamine 3000 protocol. One  $\mu$ l of Lipofectamine  
507 3000 reagent was added to 25  $\mu$ l Opti-MEM medium, while 250 ng of each plasmid (all-  
508 in-one, Cdh1-P2A-tdTomato, and Cdh1-P2A-Venus plasmid) plus 1  $\mu$ l of P3000 reagent  
509 were mixed with 25  $\mu$ l of Opti-MEM medium in a different tube. These mixtures were  
510 combined and incubated for 5 min at room temperature, and then added to the 24-well plate  
511 just after cells were seeded. Twenty-four hours after transfection, puromycin (1.5 or 2  
512  $\mu$ g/ml) was added for 2 days, and then washed out. The transiently treated-puromycin  
513 resistant cells were cultured for several days, and dual color-positive colonies were picked  
514 and passed. The genotypes for candidate dual KI clones were confirmed by PCR.

515 Transfection experiments for mouse and human cells were performed according to this  
516 procedure, and a couple of passage steps are added when AIMS assay was performed to  
517 avoid mosaicism (Fig. 1d). Fluorescent microscopes (BZ-X800, KEYENCE and IX73,  
518 OLYMPUS) were used to analyze the AIMS data.

519 To extract genomic DNA for the clonal sequence analysis, single mESC and  
520 hiPSC colonies were suspended in 5-10  $\mu$ l of 50 mM NaOH (Nacalai Tesque) and  
521 incubated at 99 °C for 10 minutes.

522

### 523 **Plasmid construction**

524 To generate all-in-one CRISPR plasmids for [5C](3A), [10C](8A), [15C](13A),  
525 [20C](18C), [25C](23A) and [30C](28A)sgRNA expression, spacer linkers were inserted  
526 into the *BpiI* sites of a PX459 plasmid (Extended Data Fig. 3). In the plasmids, 3<sup>rd</sup>, 8<sup>th</sup>, 13<sup>th</sup>,  
527 18<sup>th</sup>, 23<sup>rd</sup> or 28<sup>th</sup> cytosine was replaced with adenine since overhang sequence of CACC is  
528 required for linker ligation. The standard spacer linkers were inserted into the *BpiI* sites of  
529 the [5C](3A), [10C](8A), [15C](13A), [20C](18A), [25C](23A) or [30C](28A) PX459  
530 plasmid, leading to generation of [5C]-[30C]sgRNA expressing all-in-one plasmids.

531 For a plasmid dilution assay, sgRNA expressing plasmid was constructed by  
532 removing a Cas9-T2A-Puro cassette from a PX459 plasmid using *KpnI* and *NotI* sites. The  
533 different amount of sgRNA expressing plasmid (0-250 ng) was co-transfected with  
534 unmodified PX459 plasmid (250 ng).

535

### 536 ***In vitro* DNA cleavage assay**

537 For preparation of template DNA to be cleaved, 951 bp fragment was amplified by PCR  
538 using a Tbx3-P2A<sub>1</sub>-Venus KI plasmid. The [0C], [10C] and [25C]sgRNAs were  
539 synthesized by *in vitro* transcription (IVT) using a T7 RiboMAX Express Large Scale RNA  
540 Production System (Promega) according to the manufacture's protocol. The template DNA  
541 fragments required for IVT were amplified by PCR using forward and reverse primers. The  
542 T7 promoter sequence and cytosine tails were added to 5' end of the forward primer. Cas9  
543 protein (IDT) was suspended with a Diluent B (NEB) to make 1 μM solution. The 10 ×  
544 Cas9 reaction buffer contains 1 M HEPES, 3 M NaCl, 1 M MgCl<sub>2</sub>, and 250 mM EDTA  
545 (pH6.5). For cleavage, 1 μl of Cas9 (1 μM), 1μl of [C]sgRNAs (3 μM), 1 μl of 10 × Cas9  
546 reaction buffer, and 3 μl of template DNA (100 ng/μl) were mixed with 9 μl of distilled  
547 water (Total 15 μl reaction volume) and reacted at 37 °C for 1 hour.

548

#### 549 **Scarless mono-allelic KI of tdTomato or P2A<sub>1</sub>-Neo cassette**

550 A Tbx3-P2A<sub>1</sub>-tdTomato KI plasmid was co-transfected with Tbx3-sgRNA1-expressing  
551 PX459 to the mESCs. After transient puromycin selection, colonies were passed after  
552 dissociation and the subsequent colonies were analyzed. The colonies with mosaic  
553 tdTomato expression were excluded for the data analysis. After counting the colony  
554 number, tdTomato positive colonies were picked and genomic DNA was extracted for  
555 sequencing.

556 Neomycin (Neo) KI plasmid was constructed by replacing tdTomato cassette  
557 of the Tbx3-P2A<sub>1</sub>-tdTomato KI plasmid with a P2A<sub>1</sub>-Neo cassette. The KI plasmid was  
558 co-transfected with P2A<sub>1</sub> sgRNA1-expressing PX459 to a Tbx3-P2A<sub>1</sub>-AIMS clone. When  
559 puromycin was removed, geneticin (400 μg/ml, GIBCO) were added to select KI clones.



560 As analyzed all 8 clones were confirmed to have successful KI genotypes, geneticin-  
561 resistant colonies were counted as KI.

562

### 563 **T7E1 assays**

564 PCR reactions to amplify specific on-target or off-target sites were performed using KOD-  
565 Plus-ver.2 DNA polymerase (TOYOBO) according to the manufacture's protocol.  
566 Resulting PCR amplicons were denatured and re-annealed in 1 × NEB buffer 2 (NEB) in a  
567 total volume of 9 µl using a following conditions: 95 °C for 5 min; 95 °C to 25 °C ramping  
568 at -0.1 °C /s, and hold at 4 °C. After re-annealing, 1 µl of T7 Endonuclease I (NEB, 10  
569 units/µl) was added and incubated at 37 °C for 15 min.

570

### 571 **Bac[P] assays**

572 Purified PCR products which amplified specific on-target or off-target sites were inserted  
573 into a T-easy vector (Promega) and transformed into DH5-α bacterial cells. To enable rapid  
574 and efficient indel detection, plasmids were directly isolated from each white colony (blue  
575 white screening was done), and inserted DNA fragment was amplified by PCR. The PCR  
576 amplicons were mixed with the PCR products which were amplified from wild-type DNA  
577 template such as KI plasmids or unedited genomic DNA, and T7E1 assay was performed.  
578 Sanger sequencing was also performed for the PCR amplicons, which were not digested  
579 by T7E1, to determine the total number of colony harboring an indel. The Bac[P] value  
580 was calculated by the following formula:  $Bac[P] = Indel / Total$ .

581 Bac[P] values for both WT and R206H alleles were determined with the  
582 experiments inducing indels using various [C]sgRNAs in the mESC clone of the FOP

583 model. The targeting sites of both WT and R206H alleles were amplified by PCR and were  
584 cloned into T-easy vector. Sanger sequencing was performed for each PCR product derived  
585 from single bacterial clones as described above. Similarly, Bac[P] values for both R206H  
586 (pf) and WT (1 mm) alleles were determined by inducing indels in the FOP hiPSCs, while  
587 a corrected cell line (WT/Corrected) was used to determine Bac[P] value of the corrected  
588 allele (2 mm). Since some PCR products do not contain a G/A hallmark due to  
589 intermediate-sized deletions from 12 to about 50 nucleotides, it is not possible to determine  
590 which allele was edited for these PCR products. We observed that the fraction of such  
591 products with intermediate-sized deletions was relatively constant (approximately 20 % in  
592 the experiments in Fig. 4 and 10~20 % in the experiments in Fig. 5) and did not decrease  
593 along [C] extension, suggesting that the intermediate-sized deletions are byproducts of  
594 short indel induction processes. We therefore assigned to the products with intermediate-  
595 sized deletions to two alleles using the ratio of PCR products whose origins were  
596 convincingly confirmed. For the analysis in Fig. 5, averages of Bac[P] for WT (1 mm)  
597 allele based on comparisons of (1) R206H (pf) and WT (1 mm) alleles and (2) WT (1 mm)  
598 and corrected (2 mm) alleles were used for the subsequent computational analysis.

599

## 600 **Cellular viability assays**

601 Based on the transfection protocol described above ('Generation of AIMS'),  $2 \times 10^5$  WT  
602 hiPSCs or  $4 \times 10^4$  HEK293T cells were seeded on the 48-well plate and transfected with  
603 100 ng of the all-in-one CRISPR plasmids (2/5 scale of 24-well plate version). The hiPSCs  
604 cells were dissociated and counted using trypan blue 3 or 4 days after the transient

605 puromycin treatment at 1.5  $\mu\text{g/ml}$ , while HEK293T cells were counted 4 days after the  
606 transient puromycin treatment at 3  $\mu\text{g/ml}$ .

607

### 608 **Generation and correction of a FOP model via HDR with ssODNs**

609 The transfection protocol for 24-well plate experiment is described above ('Generation of  
610 AIMS'). For HDR induction in mESCs and HEK293T cells, 1  $\mu\text{l}$  of 10  $\mu\text{M}$  ssODN  
611 (eurofins) was added to the plasmid-lipofectamine complex, whereas 1  $\mu\text{l}$  of 3  $\mu\text{M}$  ssODN  
612 was added when hiPSCs were transfected since 10  $\mu\text{M}$  concentration induced severe  
613 toxicity. After transient puromycin selection, colonies were dissociated and plated at low  
614 density to avoid mosaicism. Single colonies were picked and genomic DNA was extracted.  
615 Sequence analysis was performed to identify G to A replacement with or without indel. For  
616 the correction of the FOP hiPSCs, clones receiving HDR were screened by digesting PCR  
617 product using *BstUI* restriction enzyme (NEB), and then the *BstUI*-positive PCR products  
618 were sequenced.

619

### 620 **Immunocytochemical analysis**

621 For p53 staining, transfection for HDR induction was performed in 1/5 scale of a 24-well  
622 plate experiment, according to the protocol described above. In this assay,  $6 \times 10^4$  hiPSCs  
623 were seeded on a matrigel-coated 96-well plate in triplicate. Puromycin selection was  
624 performed to examine p53 activity only in the transfected cells. The survived cells were  
625 fixed with 4% PFA two days after puromycin removal. For pSmad1/5/8 staining,  $5 \times 10^3$   
626 cells were plated on a matrigel-coated 96-well plate without Y-27632 and 1% FBS. After  
627 2.5 h culture, Activin-A (100 ng/ml) (R&D Systems) was treated for 30 min, and the cells

628 were fixed with 4% PFA. Antibody reaction was performed following standard protocols.  
629 Rabbit polyclonal p53 (FL-393, Santa Cruz, 1:200) and rabbit monoclonal pSmad1/5/8  
630 (D5B10, Cell Signaling Technology, 1:1000) antibodies were reacted overnight at 4 °C. A  
631 donkey anti-rabbit Alexa Fluor 488 secondary antibody (Thermo Scientific, 1:1000) was  
632 reacted RT for 30 min. Data analysis was performed by a cell count application of a  
633 fluorescent microscope to select cells with p53 and pSmad1/5/8 activation by setting  
634 fluorescence intensity thresholds (BZ-X800, KEYENCE).

635

### 636 **Chimera generation**

637 A mESC clone of a FOP model (C57BL/6 strain) was dissociated with trypsin and 5-8 cells  
638 were injected into the 8-cell embryos (E2.5) harvested from ICR pregnant mice. Injected  
639 blastocysts were transferred into the uteri of pseudo-pregnant ICR mice. Chimeric  
640 contribution was confirmed by coat-color and YFP fluorescence. YFP was observed using  
641 a fluorescence stereo microscope (M165FC, Leica).

642

### 643 **Computational modeling and analysis of single-cell level genome editing, [C]** 644 **extension, and HDR efficiency.**

645

### 646 **Comparison of AIMS[P] and Bac[P]**

647 In our study, the probability of single allele editing (P) is determined by two ways: (1)  
648 AIMS and (2) Bac[P] assay based on T7E1 assay and complementation by sequence  
649 validation. AIMS-based P (AIMS[P]) was determined as:

$$650 \quad AIMS[P] = \frac{(2F(Bi) + F(Mono))}{2} \quad (1)$$

651 , where  $F(\text{Bi})$  and  $F(\text{Mono})$  are the experimental frequency of cells with bi-allelic and  
652 mono-allelic genome editing.

653 In the initial phase of the study, we compared matched AIMS[P] and Bac[P]  
654 for nine sgRNAs (Cdh1-P2A1-sgRNA1 with different lengths of [C] extension) and  
655 observed that AIMS[P] correlated well with Bac[P] (Extended Data Fig. 6a). In the  
656 subsequent analyses, we used AIMS[P] for modeling of indel insertion frequency in  
657 Figures 2 and 3 and Bac[P] for modeling of HDR frequency in Figures 4 and 5.

658

### 659 **Modeling of genome editing frequency at the single-cell level**

660 We performed extensive analysis by combining AIMS and generation of sgRNAs with  
661 various [C] extension. When the editing efficiency is homogenous across the cell  
662 population, the frequency of cells with bi-allelic, mono-allelic or no genome editing,  $F(\text{Bi})$ ,  
663  $F(\text{Mono})$ , or  $F(\text{No})$  can be estimated as:

$$664 \quad F(\text{Bi}) = \text{AIMS}[P]^2 \quad (2)$$

$$665 \quad F(\text{Mono}) = 2\text{AIMS}[P](1 - \text{AIMS}[P]) \quad (3)$$

$$666 \quad F(\text{No}) = (1 - \text{AIMS}[P])^2 \quad (4)$$

667 We first used these equations and observed that actual  $F(\text{Mono})$  is lower than estimated  
668  $F(\text{Mono})$  especially around the intermediate AIMS[P] levels ( $\text{AIMS}[P] \sim 0.5$ ). Thus,  
669 heterogeneity in genome editing frequency at the single-cell level was considered and  
670 modeled using beta distribution. Probability density

671 functions of  $P$  and mean  $P$  ( $E(P)$ ) are given by:

$$672 \quad f(P; \alpha, \beta) = \frac{P^{\alpha-1}(1 - P)^{\beta-1}}{B(\alpha, \beta)} \quad (5)$$

673 
$$E(P) = \frac{\alpha}{\alpha + \beta} \quad (6)$$

674 Mean P corresponds to AIMS[P] (or Bac[P]). Using beta distribution, F(Bi), F(Mono),  
675 F(No) can be described as:

676 
$$F(Bi) = \int_0^1 P^2 f(P; \alpha, \beta) dP \quad (7)$$

677 
$$F(Mono) = \int_0^1 2P(1 - P) f(P; \alpha, \beta) dP \quad (8)$$

678 
$$F(No) = \int_0^1 (1 - P)^2 f(P; \alpha, \beta) dP \quad (9)$$

679 Using these equations, we first determined  $\alpha$  value for each experiment that  
680 minimized squared residuals between experimental F(Bi), F(Mono), and F(No) and  
681 simulated F(Bi), F(Mono), and F(No) (Extended Data Fig. 6b). As shown in Extended Data  
682 Fig. 6b, we observed that optimized  $\alpha$  values were relatively constant in a wide range of  
683 AIMS[P] ( $0.1 < \text{AIMS}[P] < 0.9$ ). Thus, we next used the sum of squared residuals (SSR)  
684 as the error function:  $\text{SSR} = \sum(\text{Experimental data} - \text{Simulated data})^2$ , and determined a  
685 constant  $\alpha$  value that minimized SSR (Extended Data Fig. 6c, left,  $\alpha = 0.715$ ). Probability  
686 density functions with different mean P are shown in a middle panel of Extended Data Fig.  
687 6c. We confirmed that introduction of beta distribution greatly reduced SSR compared to  
688 the setting of homogenous editing frequency (Extended Data Fig. 6c, right) and well  
689 explained the experimental F(Bi), F(Mono), and F(No) along diverse AIMS[P] (Extended  
690 Data Fig. 6d). In addition, we tested normal distribution to approximate the heterogeneity  
691 in genome editing frequency at the single-cell level, but observed that beta distribution was  
692 superior to normal distribution.

693

## 694 **Effects of [C] extension on CRISPR-Cas9 system**

695 The efficiency of the single-allele editing  $P$  ( $P(pf)$ ; pf: perfect match) can be described as:

$$696 \quad P(pf) = \frac{S}{K + S} \quad (10)$$

697 , where the concentration of effective sgRNA-Cas9 complexes and the dissociation  
698 constant between the sgRNA and its target site are defined as  $S$  and  $K$ , respectively. Based  
699 on high editing efficiency without [C] extension ( $P \sim 1$ ), we assumed that the recovery rate  
700 from single-site damage is very low and did not consider in subsequent analysis. To  
701 mechanistically understand the effects of [C] extension and 1 mismatch, we further  
702 assumed that [C] extension and 1 mismatch decreases  $S$  and increases  $K$ , respectively. By  
703 setting  $S$  to 1 for each of different sgRNA sequences without [C] extension, we first  
704 approximated  $K$  values for each of different sgRNA sequences (8 sgRNA sequences).  
705 When  $P$  (AIMS[P] or Bac[P]) was 1,  $P$  was set to 0.99. Next, relative  $S$  concentrations were  
706 determined using  $K$  and AIMS[P] for sgRNAs with [C] extension. While the relationships  
707 between [C] extension and AIMS[P] varied among different sgRNA sequences (Extended  
708 Data Fig. 4a), we found clear and similar inverse relationships between [C] extension and  
709 relative  $S$  values for different sgRNA sequences (Extended Data Fig. 4b). A linear  
710 regression gave a good fit to logarithm of relative  $S$  against the length of [C] extension for  
711 all sgRNA sequences (Extended Data Fig. 4b). Furthermore, analysis of covariance  
712 (ANCOVA) indicated that slopes of linear regression did not significantly differ among  
713 various sgRNA sequences (Extended Data Fig. 4c). This suggests that [C] extension exerts  
714 uniform suppression effects on diverse sgRNA sequences.

715

## 716 **Effect of cytosine extension on specificity of CRISPR-Cas9 system**

717 As described above, 1mm (or 2mm) is considered to increase K in the equation (10). The  
718 efficiency of the single-gene editing P on 1mm (or 2mm) target can be described as:

$$719 \quad P(1mm \text{ or } 2mm) = \frac{S}{mK + S} \quad (11)$$

720 , where m is the ratio of K for 1mm target to K for perfect match target.

721 Thus, the single-gene editing P on 1mm (or 2mm) can be expressed as the function of P(pf)  
722 as:

$$723 \quad P(1mm \text{ or } 2mm) = \frac{P(pf)}{(1 - m)P(pf) + m} \quad (12)$$

724 For the results in Figures 4 and 5, we determined m that fits to matched P(pf) and P(1mm  
725 or 2mm) by using SSR as the error function (Extended Data Fig. 7a).

726 The ratios between P(pf) vs. P(1mm or 2mm) are also described as the function of P(pf)  
727 as:

$$728 \quad \frac{P(1mm \text{ or } 2mm)}{P(pf)} = \frac{1}{(1 - m)P(pf) + m} \quad (13)$$

$$729 \quad \frac{P(pf)}{P(1mm \text{ or } 2mm)} = (1 - m)P(pf) + m \quad (14)$$

730 As shown in Extended Data Fig. 7b, decreasing P(pf) contributes to reduction of relative  
731 off-target ratio and increases in specificity. Thus, downsizing CRISPR-Cas9 activities by  
732 [C] extension is also beneficial for reduction of relative off-target activities and  
733 enhancement in specificity.

734

#### 735 **Modeling of HDR frequency from homozygous states (Figure 4)**

736 Using beta distribution, frequencies of the various HDR clones in Figure 4 are determined  
737 as follows (Extended Data Fig. 8a, b):



$$738 \quad F(WT/R206H) = \int_0^1 2hP(1-P)(1-(1-h)P')f(P; \alpha, \beta)dP \quad (15)$$

$$739 \quad F(WT/R206H + indel) = \int_0^1 2h(1-h)P(1-P)P'f(P; \alpha, \beta)dP \quad (16)$$

$$740 \quad F(indel/R206H) = \int_0^1 2h(1-h)P^2(1-(1-h)P')f(P; \alpha, \beta)dP \quad (17)$$

$$741 \quad F(indel/R206H + indel) = \int_0^1 2h(1-h)^2P^2P'f(P; \alpha, \beta)dP \quad (18)$$

$$742 \quad F(R206H/R206H) = \int_0^1 h^2P^2f(P; \alpha, \beta)dP \quad (19)$$

$$743 \quad F(overall HDR) = \int_0^1 (-h^2P^2 + 2hP)f(P; \alpha, \beta)dP \quad (20)$$

744 , where efficiency of HDR on Cas9-cleaved single allele and the probability of the single-  
745 gene editing on edited target, i.e. 1mm target, are defined as  $h$  and  $P'$ , respectively  
746 (Extended Data Fig. 8b).  $P'$  is described in the same manner to equation (12):

$$747 \quad P' = \frac{P}{(1-m)P + m} \quad (21)$$

748 , where  $m$  is 1.723. [C] extension decreases  $P$  according to the length of [C] extension  
749 (Extended Data. Fig. 8c).

750 For simplicity,  $h$  was considered to be constant across cell population for each  
751 experiment. Based on the experimental results of overall HDR frequencies and the equation  
752 (eq. #20),  $h$  was estimated for each [C] extended sgRNA (Fig. 4e). While  $h$  without [C]  
753 extension was very low (2.07%),  $h$  with [C] extension was generally high around 11%.  
754 This suggests that conventional system without [C] extension reduces HDR and [C]  
755 extension releases the suppression to the upper limit of HDR. Based on these findings, we  
756 used mean of estimated  $h$  (10.99%) as the  $h$  for [C] extended sgRNAs and estimated the

757 frequency of distinct HDR patterns, overall HDR and precise HDR (Fig. 4f, g). For sgRNA  
758 without [C] extension, estimated  $h$  (2.07%) was used. The simulated data well fitted to the  
759 experimental results (Fig. 4f, g). To predict HDR outcomes continuously, we designed  
760 hypothetical function of  $h$  along  $P$  ( $h = 2.07\%$  ( $P > 0.9$ );  $h = 10.99\%$  ( $P < 0.9$ )) (Extended  
761 Data Fig. 8d) and estimated the frequency of distinct HDR patterns, overall HDR and  
762 precise HDR (Extended Data Fig. 8e, f). In the simulation, maximum of precise HDR is  
763 obtained when  $P = 0.313$  (Extended Data. Fig. 8c, f).

764

### 765 **Modeling of HDR-based gene correction (Figure 5)**

766 Using beta distribution, frequencies of the various HDR clones in Figure 5 are determined  
767 as follows (Extended Data Fig. 8a and 10a, b):

$$768 \quad F(WT/R206H\_Corrected) = \int_0^1 hP(1 - P')(1 - P'')f(P; \alpha, \beta)dP \quad (22)$$

$$769 \quad F(WT\_indel/R206H\_Corrected) = \int_0^1 h(1 - h)PP'(1 - P'')f(P; \alpha, \beta)dP \quad (23)$$

$$770 \quad F(WT\_Corrected/R206H\_Corrected) = \int_0^1 h^2PP'(1 - P'')^2f(P; \alpha, \beta)dP \quad (24)$$

$$771 \quad F(WT\_Corrected\_indel/R206H\_Corrected) = \int_0^1 h^2PP'P''(1 - P'')f(P; \alpha, \beta)dP \quad (25)$$

$$772 \quad F(WT/R206H\_Corrected\_indel) = \int_0^1 hP(1 - P')P''f(P; \alpha, \beta)dP \quad (26)$$

$$773 \quad F(WT\_indel/R206H\_Corrected\_indel) = \int_0^1 h(1 - h)PP'P''f(P; \alpha, \beta)dP \quad (27)$$

$$774 \quad F(WT\_Corrected/R206H\_Corrected\_indel) = \int_0^1 h^2PP'P''(1 - P'')f(P; \alpha, \beta)dP \quad (28)$$

$$775 \quad F(WT\_Corrected\_indel/R206H\_Corrected\_indel) = \int_0^1 h^2 P P' P''^2 f(P; \alpha, \beta) dP \quad (29)$$

$$776 \quad F(WT\_Corrected/R206H) = \int_0^1 h(1-P)P'(1-P'')f(P; \alpha, \beta)dP \quad (30)$$

$$777 \quad F(WT\_Corrected\_indel/R206H) = \int_0^1 h(1-P)P'P''f(P; \alpha, \beta)dP \quad (31)$$

$$778 \quad F(WT\_Corrected/R206H\_indel) = \int_0^1 h(1-h)PP'(1-P'')f(P; \alpha, \beta)dP \quad (32)$$

$$779 \quad F(WT\_Corrected\_indel/R206H\_indel) = \int_0^1 h(1-h)PP'P''f(P; \alpha, \beta)dP \quad (33)$$

$$780 \quad F(overall\ HDR) = \int_0^1 (-h^2PP' + hP + hP')f(P; \alpha, \beta)dP \quad (34)$$

781 , where efficiency of HDR on Cas9-cleaved single allele and the probability of the single-  
 782 gene editing on WT or HDR-corrected target, i.e. 1mm or 2mm target, are defined as h and  
 783 P' or P'', respectively (Extended Data Fig. 10a). P' and P'' is described in the same manner  
 784 to equation (12):

$$785 \quad P' = \frac{P}{(1-m_1)P + m_1} \quad (35)$$

$$786 \quad P'' = \frac{P}{(1-m_2)P + m_2} \quad (36)$$

787 , where m1 is 3.459 and m2 is 12.0793, respectively (Extended Data Fig. 7). The  
 788 relationship between [C] extension and P is shown in Fig. 5c and Extended Data. Fig. 10b.

789 For simplicity, h was considered to be constant across cell population for  
 790 each experiment. In addition, HDR rate on R206H and WT allele was considered to be  
 791 same. Based on the experimental results of overall HDR frequencies and the equation (eq.  
 792 #34), h was estimated for each [C] extended sgRNA (Fig. 5h). Consistent with the results

793 in Fig. 4,  $h$  with [C] extension was higher than  $h$  without [C] extension. Together with the  
794 results in Fig. 4, this suggests that conventional system without [C] extension reduces HDR  
795 probably due to extensive DNA damage and p53 response (as examined in Fig. 5d, e) and  
796 [C] extension releases the suppression to the upper limit of HDR. We also observed that  $h$   
797 in Fig. 5 was generally higher than  $h$  in Fig. 4. This may be because cell lines used in Fig.  
798 5 have only one perfect match target, thus eliciting weaker suppressive effects on HDR  
799 rate, while cell lines used in Fig. 4 have two perfect match targets. Based on these findings,  
800 we used mean of estimated  $h$  (26.93%) as the  $h$  for [C] extended sgRNAs and estimated  
801 the frequency of overall HDR and precise HDR (Fig. 5i and Extended Data Fig. 10c). For  
802 sgRNA without [C] extension, estimated  $h$  (13.21%) was used. The simulated data well  
803 fitted to the experimental results (Fig. 5i and Extended Data Fig. 10c). To predict HDR  
804 outcomes continuously, we designed hypothetical function of  $h$  along  $P$  ( $h = 13.21\%$  ( $P >$   
805  $0.9$ );  $h = 26.93\%$  ( $P < 0.9$ )) (Extended Data Fig. 10d) and estimated the frequency of  
806 distinct HDR patterns, overall HDR and precise HDR (Extended Data Fig. 10e). In the  
807 simulation, maximum of precise HDR is obtained when  $P = 0.424$  (Extended Data. Fig.  
808 10b, e).

809

## 810 **Statistics**

811 Sample sizes were determined based on our previous experience of performing similar sets  
812 of experiments. Statistical tests were performed using JMP (14.2.0) and R (3.2.1). We  
813 verified the equality of variance assumption by using the F-test or Levene test. As a pre-  
814 test of normality, we used the Kolmogorov–Smirnov test. Differences between two groups  
815 were analyzed using two-tailed Student's t-test (Fig. 2e) or Welch's t-test (Fig. 2h, right).

816 Comparisons among more than two groups were analyzed using one-way or two-way  
817 ANOVA and post hoc Tukey–Kramer test (Fig. 2g, 4d, and Extended Data Fig. 5b, e, f) or  
818 Welch's test with post hoc Games–Howell test (Fig. 1g, 2a, 5d, e, and Extended Data Fig.  
819 9b, d, f, h). In all bar graphs, data are expressed as mean  $\pm$  s.e.m. (Fig. 2g, h, 4d, 5f, and  
820 Extended Data Fig. 1d, 5a-c, e, f) or  $\pm$  s.d. (Fig. 2a, 5d, e, g, and Extended Data Fig. 9b, d,  
821 f and h). In the scatter dot plots, center lines show medians; whiskers show 25th and 75th  
822 percentiles from median (Fig. 1g). In the box plots, center lines show medians; box limits  
823 indicate the 25th and 75th percentiles; whiskers range from a minimum to a maximum  
824 value (Fig. 2e).

825

#### 826 **Data availability**

827 All data will be made available upon request to the corresponding author.

828

#### 829 **Code availability**

830 Scripts needed to reconstruct analysis files will be made available on request.

831

832

#### 833 **Methods References**

- 834 39 Yagi, M. *et al.* Derivation of ground-state female ES cells maintaining gamete-  
835 derived DNA methylation. *Nature* **548**, 224-227, doi:10.1038/nature23286 (2017).  
836 40 Okita, K. *et al.* A more efficient method to generate integration-free human iPS  
837 cells. *Nat Methods* **8**, 409-412, doi:10.1038/nmeth.1591 (2011).  
838 41 Srinivas, S. *et al.* Cre reporter strains produced by targeted insertion of EYFP and  
839 ECFP into the ROSA26 locus. *BMC Dev Biol* **1**, 4, doi:10.1186/1471-213x-1-4  
840 (2001).

841

842

843 **ACKNOWLEDGEMENTS**

844 We thank Dr. Frank Costantini for providing *R26R<sup>EYFP/YFP</sup>* mice; Atsushi Miyawaki and  
845 Hiroyuki Miyoshi for sharing reagents; Yuuki Honda, Mariko Tasai, Chiaki Kaieda,  
846 Shusaku Abe, Takashi Ishiuchi, and Hiroyuki Sasaki for excellent technical assistance.  
847 This work was supported in part by grants from the JSPS KAKENHI (17K15046,  
848 18H04737, and 20H05041 to M.K.; 19K24694 to H.I.S.; 18H05102, 19H01177, 19H05267,  
849 and 20H05040 to A.S.), the AMED (JP20ae0201012h to M.K.; JP20bm0704034 to A.S.),  
850 Center for Clinical and Translational Research of Kyushu University Hospital (to M.K.),  
851 Takeda Science Foundation (to M.K. and A.S.), Uehara Memorial Foundation (to A.S.),  
852 and Mitsubishi Foundation (to A.S.). Studies conducted by H.I.S. at the Massachusetts  
853 Institute of Technology were supported by United States Public Health Service grants R01-  
854 GM034277 and R01-CA133404 to P. A. Sharp and P01-CA042063 to T. Jacks from the  
855 NIH, as well as a Koch Institute Support (core) grant P30-CA14051 from the National  
856 Cancer Institute, and supported in part by an agreement between the Whitehead Institute  
857 for Biomedical Research and Novo Nordisk.

858

859 **AUTHOR CONTRIBUTIONS**

860 M.K. conceived and designed the research. M.K. and R.K. performed experiments. M.K.  
861 and H.I.S. analyzed data. H.I.S. performed computational analysis. M.K., H.I.S. and A.S.  
862 wrote the manuscript. All authors read and approved the final manuscript. A.S. supervised  
863 the project.

864

865 **Competing interests**

866 The authors declare no competing interests.

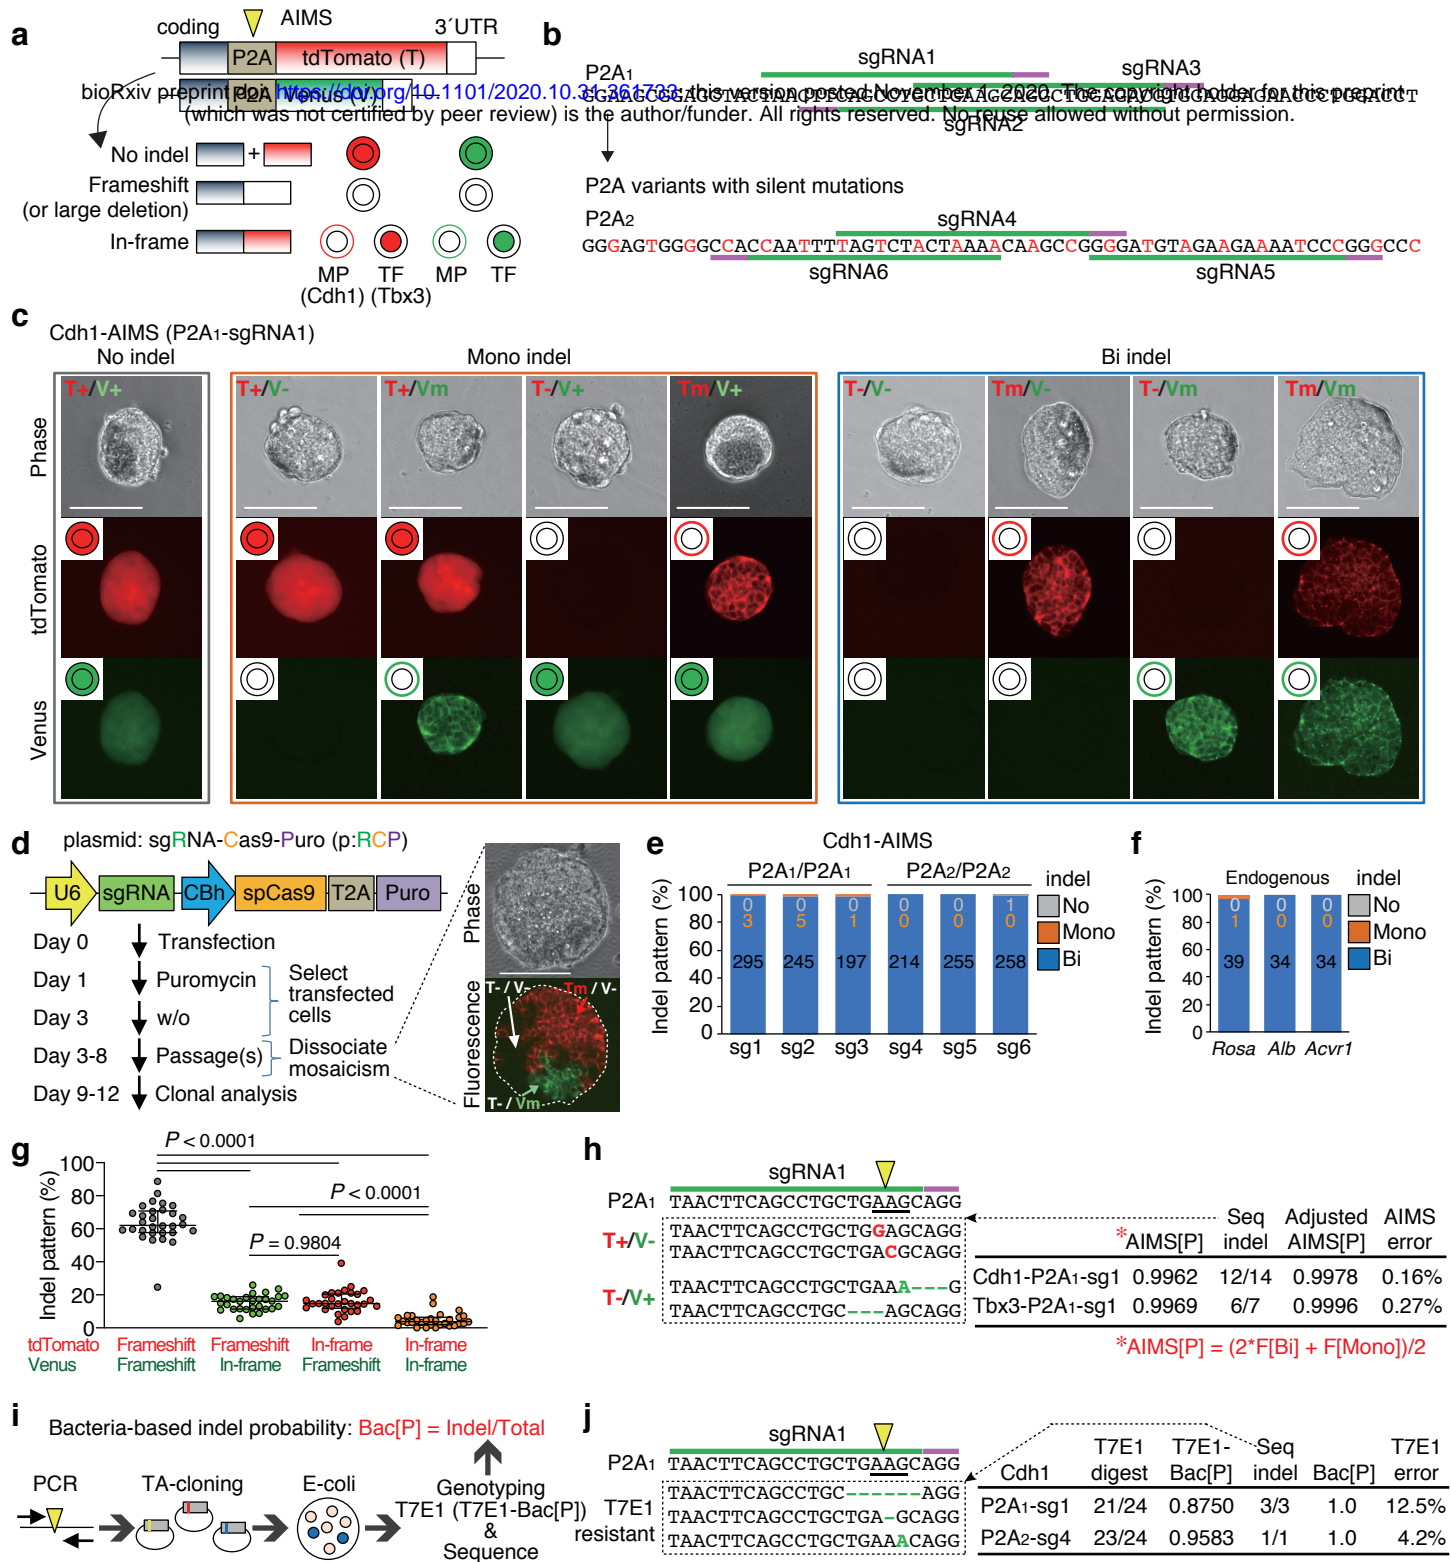

**Fig. 1. Visualization of allele-specific genome editing events by AIMS.**

**a**, Schematic of AIMS. A mESC clone harboring dual color reporters is generated by fusing P2A-fluorescence cassettes at the ends of coding regions of target genes. P2A is targeted by sgRNA-Cas9 (yellow arrowhead). TF, Transcription factor; MP, Membrane protein. **b**, Target sequences of sgRNAs in the P2A1 and P2A2 are shown. The original P2A is denoted as P2A1, and the variant generated by silent mutations (red) is denoted as P2A2. **c**, Representative results of Cdh1-P2A1-AIMS. Genotypes are determined by nine combinations of tdTomato/Venus expression and localization. T, tdTomato; V, Venus; +, no indel; m, in-frame indel represented by membrane localization; -, frameshift indel or large deletion represented by loss of fluorescence. Scale bar indicates 100  $\mu$ m. **d**, Schematic description of protocol for genome editing using all-in-one CRISPR plasmids (pRCP, sgRNA-Cas9-Puro). The images show mosaicism in a single cell-derived primary puromycin-resistant colony. Scale bar indicates 100  $\mu$ m. **e**, Indel patterns are measured by Cdh1-P2A1-AIMS and Cdh1-P2A2-AIMS. sg1-6, sgRNAs1-6 shown in Fig. 1b. Data are shown as mean from  $n = 3$  independent experiments performed at different times, except for sg1 ( $n = 6$ ). Total number of clones analyzed is shown in each column (also in f). **f**, Indel patterns for the endogenous genes are determined by sequence analysis at the clonal level. Data are shown as mean from  $n = 3$  independent experiments performed at different times. **g**, Percentages of the four types of bi-allelic indel patterns are shown. Dots indicate individual data points ( $n = 30$ , 6 sgRNAs, Tbx3- and Cdh1-AIMS) and median with interquartile range are shown. Statistical significance is assessed using Welch's test with post hoc Games-Howell test. **h**, Representative indel sequences in the P2A1 region of tdTomato or Venus allele in the T+/V- or T-/V+ clones, respectively (left) and AIMS error rates (right) are shown. AIMS[P], the value of indel probability calculated from frequency (F) of bi-allelic [Bi] and mono-allelic [Mono] indel clones. The formula is shown in red below. Seq-indel, the exact number of bi-allelic indel clones with a phenotype of T+/V- or T-/V+ is determined by sequencing the tdTomato or Venus allele, respectively. Adjusted AIMS[P], indel probability considering the Seq-indel data. AIMS error, the values of Adjusted AIMS[P] minus AIMS[P]. **i**, Schematic description of the procedure for calculating bacteria-based indel probabilities (Bac[P]). **j**, Representative T7E1-insensitive indel sequences (left) and the error rate of the T7E1 assay (right) are shown. T7E1-Bac[P], indel probability calculated from the rate of clone number sensitive to T7E1 digestion. Seq-indel, the exact number of indel clones is determined by sequencing the PCR products which are not digested by T7E1. Bac[P], indel probability considering the Seq-indel data. T7E1 error, the values of Bac[P] minus T7E1-Bac[P]. Arrowheads and underlines indicate the position of the DSB sites and codon, respectively (h, j).





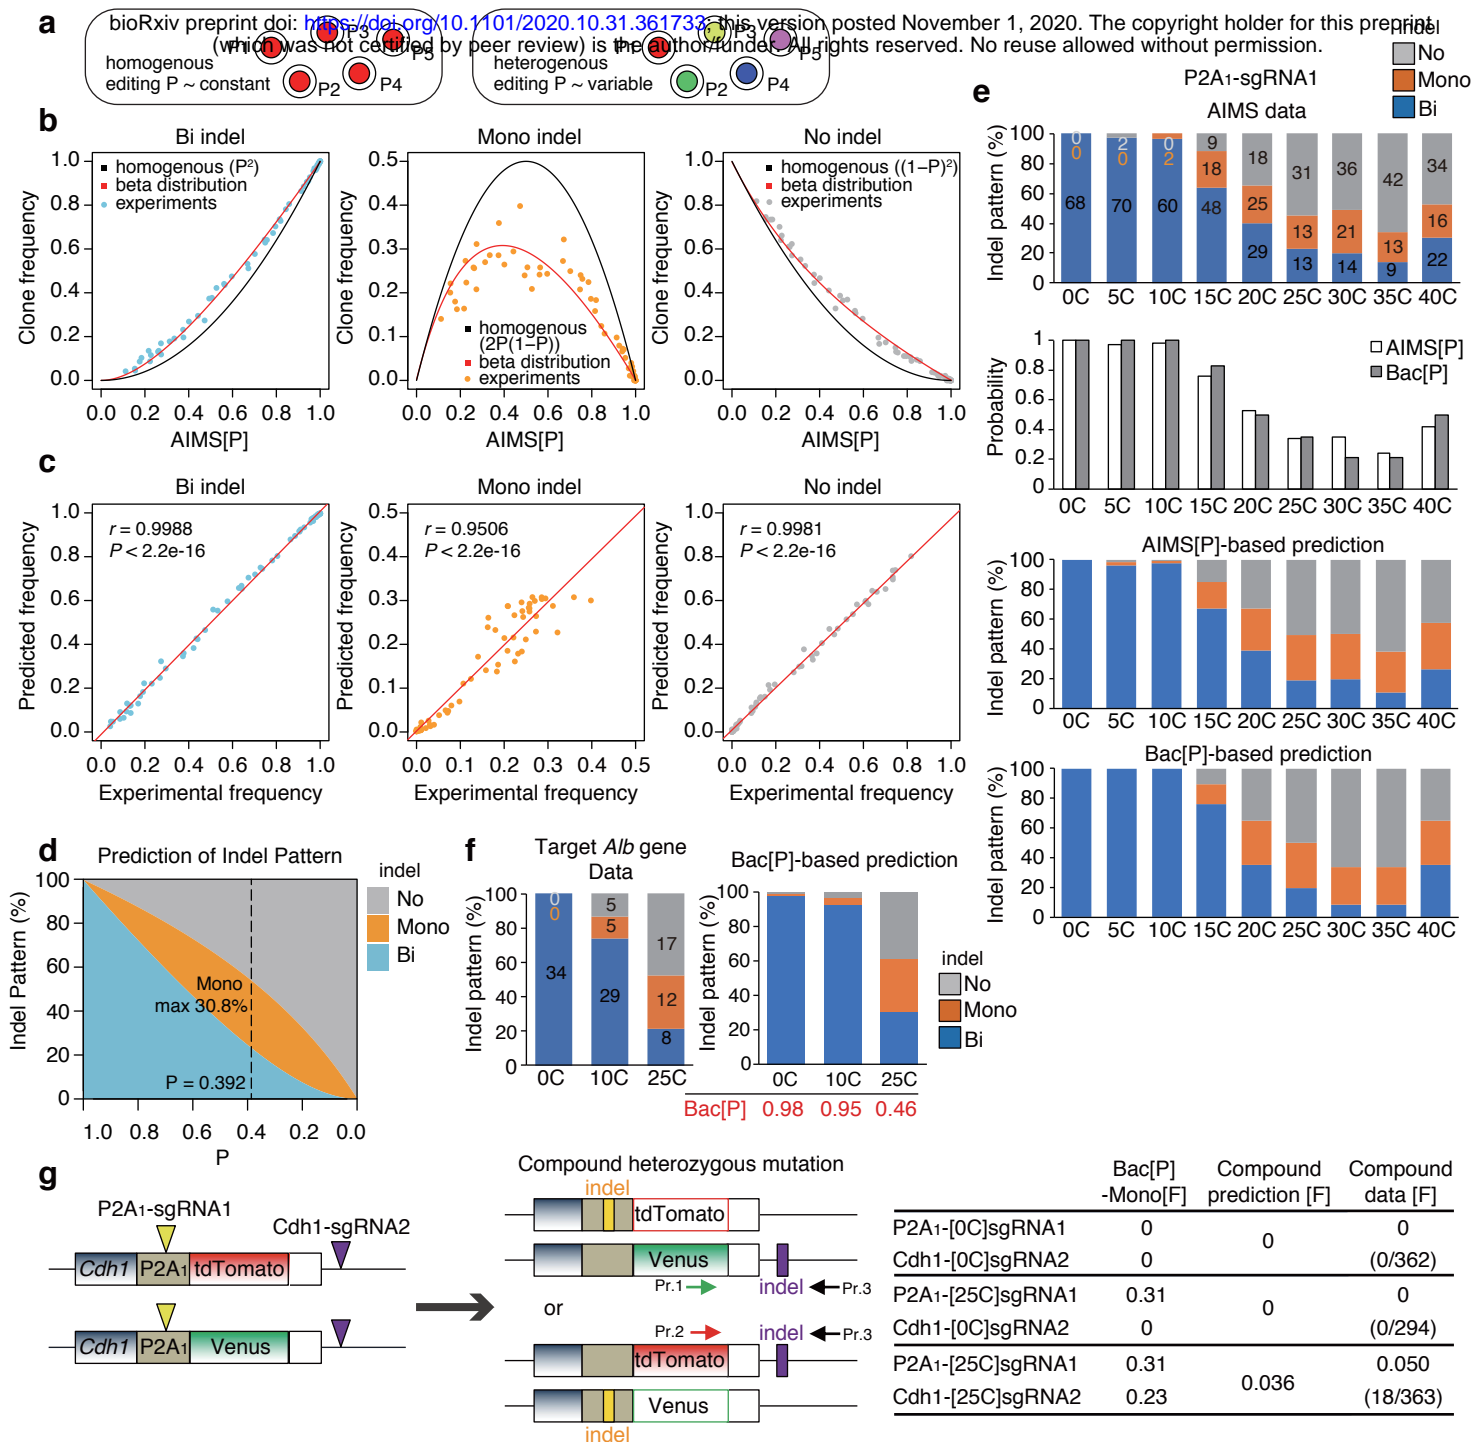

**Fig. 3. Computational prediction of single-cell heterogeneity of genome editing and bi-/mono-allelic indel frequency.**

**a**, Homogeneity vs heterogeneity of genome editing frequency at the single cell level. **b**, Relationships between AIMS[P] and clone frequency for Bi-, Mono-, or No indel ( $n = 64$ ). The two curves are generated based on the assumption that single-cell editing probability is homogenous or heterogeneous. In a latter case, beta distribution is adopted. **c**, Correlation between experimental data and beta distribution-based prediction of the frequencies of Bi-, Mono-, or No indel. Linear regression and Pearson's correlation coefficients ( $r$ ) with P-values are shown. **d**, Relationships between indel probability ( $P$ ) and allelic indel pattern, simulated by the beta distribution model. The maximum frequency (30.8%) of mono-allelic indel is obtained when setting  $P$  to 0.392. **e**, Comparison between AIMS experimental results with *Cdh1*-P2A1-sgRNA1 and predictions based on AIMS[P] and Bac[P]. Data are shown as mean from  $n = 3$  independent experiments performed at different times and total number of clones analyzed are shown in each column in the AIMS data. **f**, Comparison between experimental data and Bac[P]-based prediction for indel pattern when targeting an endogenous *Alb* (*Albumin*) gene. Data are shown as mean  $\pm$  s.e.m. from  $n = 3$  independent experiments performed at different times and total number of clones analyzed are shown in each column. **g**, Prediction and generation of compound heterozygous mutation clones using *Cdh1*-P2A1-AIMS. Bac[P]-Mono[F], frequency of mono-allelic indel (Mono[F]) predicted from Bac[P]. Brackets indicate the number of compound heterozygous mutation clones generated by  $n = 3$  independent experiments performed at different times. Yellow and purple arrowheads and boxes indicate DSB sites and indels, respectively. Pr.1-3, primers for genotyping.

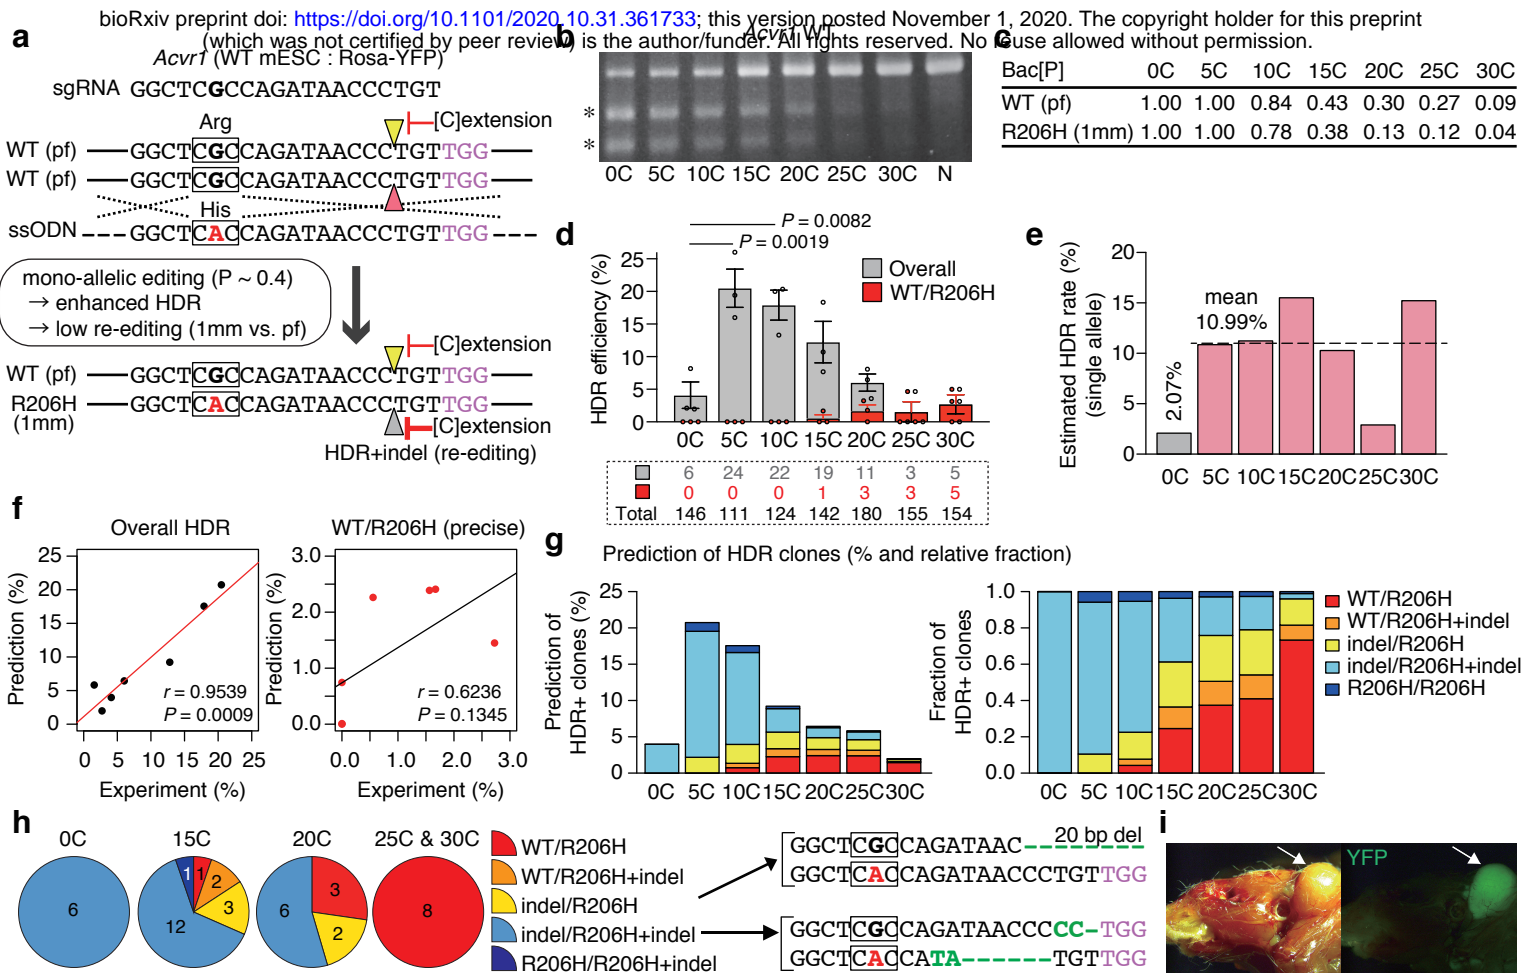

**Fig. 4. Generation of a heterozygous FOP disease model.**

**a**, Schematic of precise HDR for mono-allelic G>A replacement without indels on both HDR and non-HDR alleles in *Acvr1* gene in mESCs. Arrowheads indicate DSB sites. Squares indicate a codon. pf, perfect match; 1mm, 1 bp mismatch. **b**, T7E1 assay. Asterisks indicate PCR products digested by T7E1. N, PX459 plasmid without spacer. **c**, Bac[P] values for both WT and R206H alleles. **d**, Clonal analysis of overall HDR and precise HDR (WT/R206H) efficiencies in the WT/WT mESCs. Overall HDR comprises precise HDR and other HDRs with indels in the HDR- and/or non-HDR-alleles. The number of clones analyzed is shown in a dotted square. Data are shown as mean  $\pm$  s.e.m. from  $n = 3$  independent experiments performed at different times. Statistical significance for overall HDR is assessed using one-way ANOVA and post hoc Tukey–Kramer test. **e**, Computational estimation of HDR rates at single allele. **f**, Correlation between experimental and computationally predicted HDR frequencies. Overall (left) and precise WT/R206H HDR (right) are shown. Linear regression and Pearson's correlation coefficients ( $r$ ) with  $P$ -values are shown. **g**, Prediction of diverse HDR events (left) and relative fraction (right). **h**, Detailed distribution of HDR events shown in the Fig. 4d is shown with actual clone number. Representative sequences of indel/R206H and indel/R206H+indel clones are shown. Squares indicate codon. **i**, FOP mouse model is generated by microinjection of a WT/R206H clone. An arrow indicates an area of ectopic ossification with mESC contribution, which is traced by the Rosa-YFP reporter.

bioRxiv preprint doi: <https://doi.org/10.1101/2020.10.31.361733>; this version posted November 1, 2020. The copyright holder for this preprint (which was not certified by peer review) is the author/funder. All rights reserved. No reuse allowed without permission.

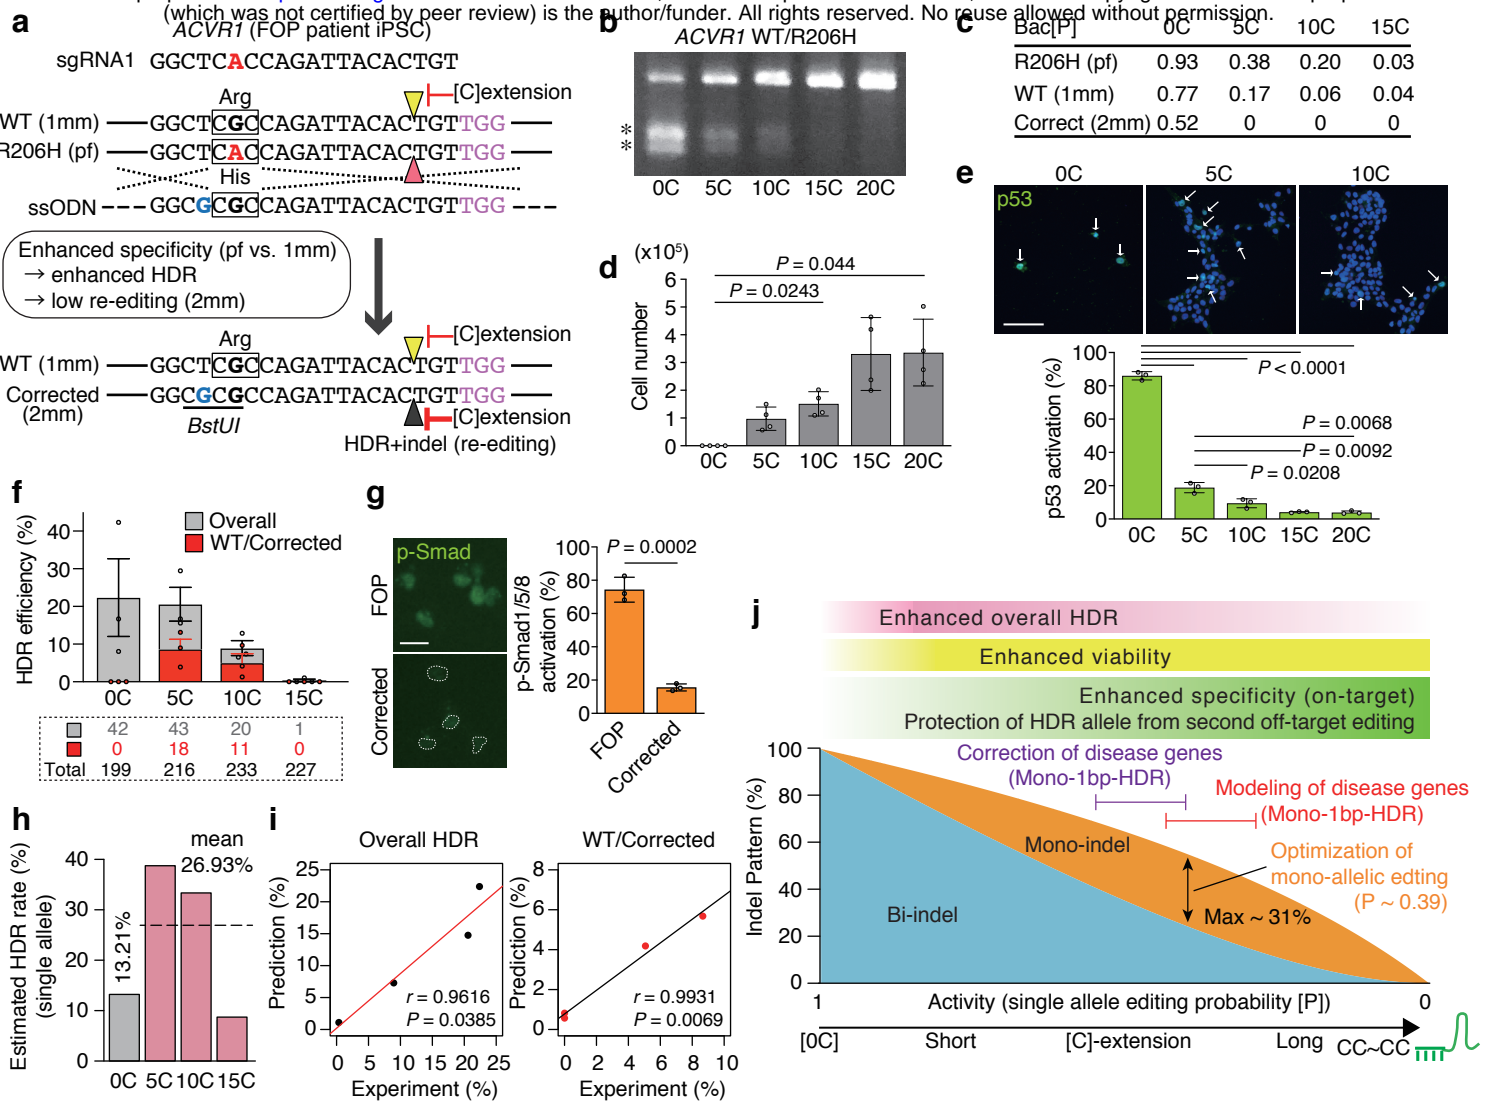

**Fig. 5. Safe and systematic precise gene correction in FOP hiPSCs.**

**a**, Schematic of R206H allele-selective precise HDR for A>G correction in FOP iPSCs (WT/R206H). Silent mutation of guanine (G, blue) creates a *Bst*UI restriction enzyme site, which allows for rapid selection of HDR clones and for discriminating the Corrected allele (2mm) from original WT one (1mm). Arrowheads indicate DSB sites. Squares indicate codon. pf, perfect match; 1mm, 1 bp mismatch; 2mm, 2 bp mismatches. **b**, T7E1 assay. Asterisks indicate PCR products digested by T7E1. N, PX459 plasmid without spacer. **c**, Bac[P] values for R206H (pf), WT (1mm) and Corrected (2mm) alleles. **d**, Cytotoxicity is examined by counting cell number after all-in-one plasmid transfection and puromycin selection. Data are shown as mean and s.d. from  $n = 4$  biological replicates. Statistical significance is assessed using Welch's test with post hoc Games–Howell test. **e**, Immunocytochemistry to examine p53 activation in the FOP hiPSCs. Data are shown as mean and s.d. from  $n = 3$  biological replicates. Statistical significance is assessed using Welch's test with post hoc Games–Howell test. **f**, Clonal analysis of overall HDR and precise HDR (WT/Corrected) efficiencies in the FOP hiPSCs (WT/R206H). Overall HDR comprises R206- and/or WT-allele-HDR with or without indels. The number of clones analyzed is shown in a dotted square. Data are shown as mean  $\pm$  s.e.m. from  $n = 3$  independent experiments performed at different times. **g**, Immunocytochemistry to examine Activin-induced pSmad1/5/8 activation in the FOP (WT/R206H) hiPSCs and a corrected (WT/Corrected) clone. Data are shown as mean and s.d. from  $n = 3$  biological replicates. Statistical significance is assessed using two-tailed Student's t-test. **h**, Computational estimation for HDR rate at single allele. **i**, Correlation between experimental HDR frequencies and computational modeling. Overall (left) and precise WT/Corrected HDR (right) are shown. Linear regression and Pearson's correlation coefficients ( $r$ ) with P-values are shown. **j**, Summary of [C] extension methods.

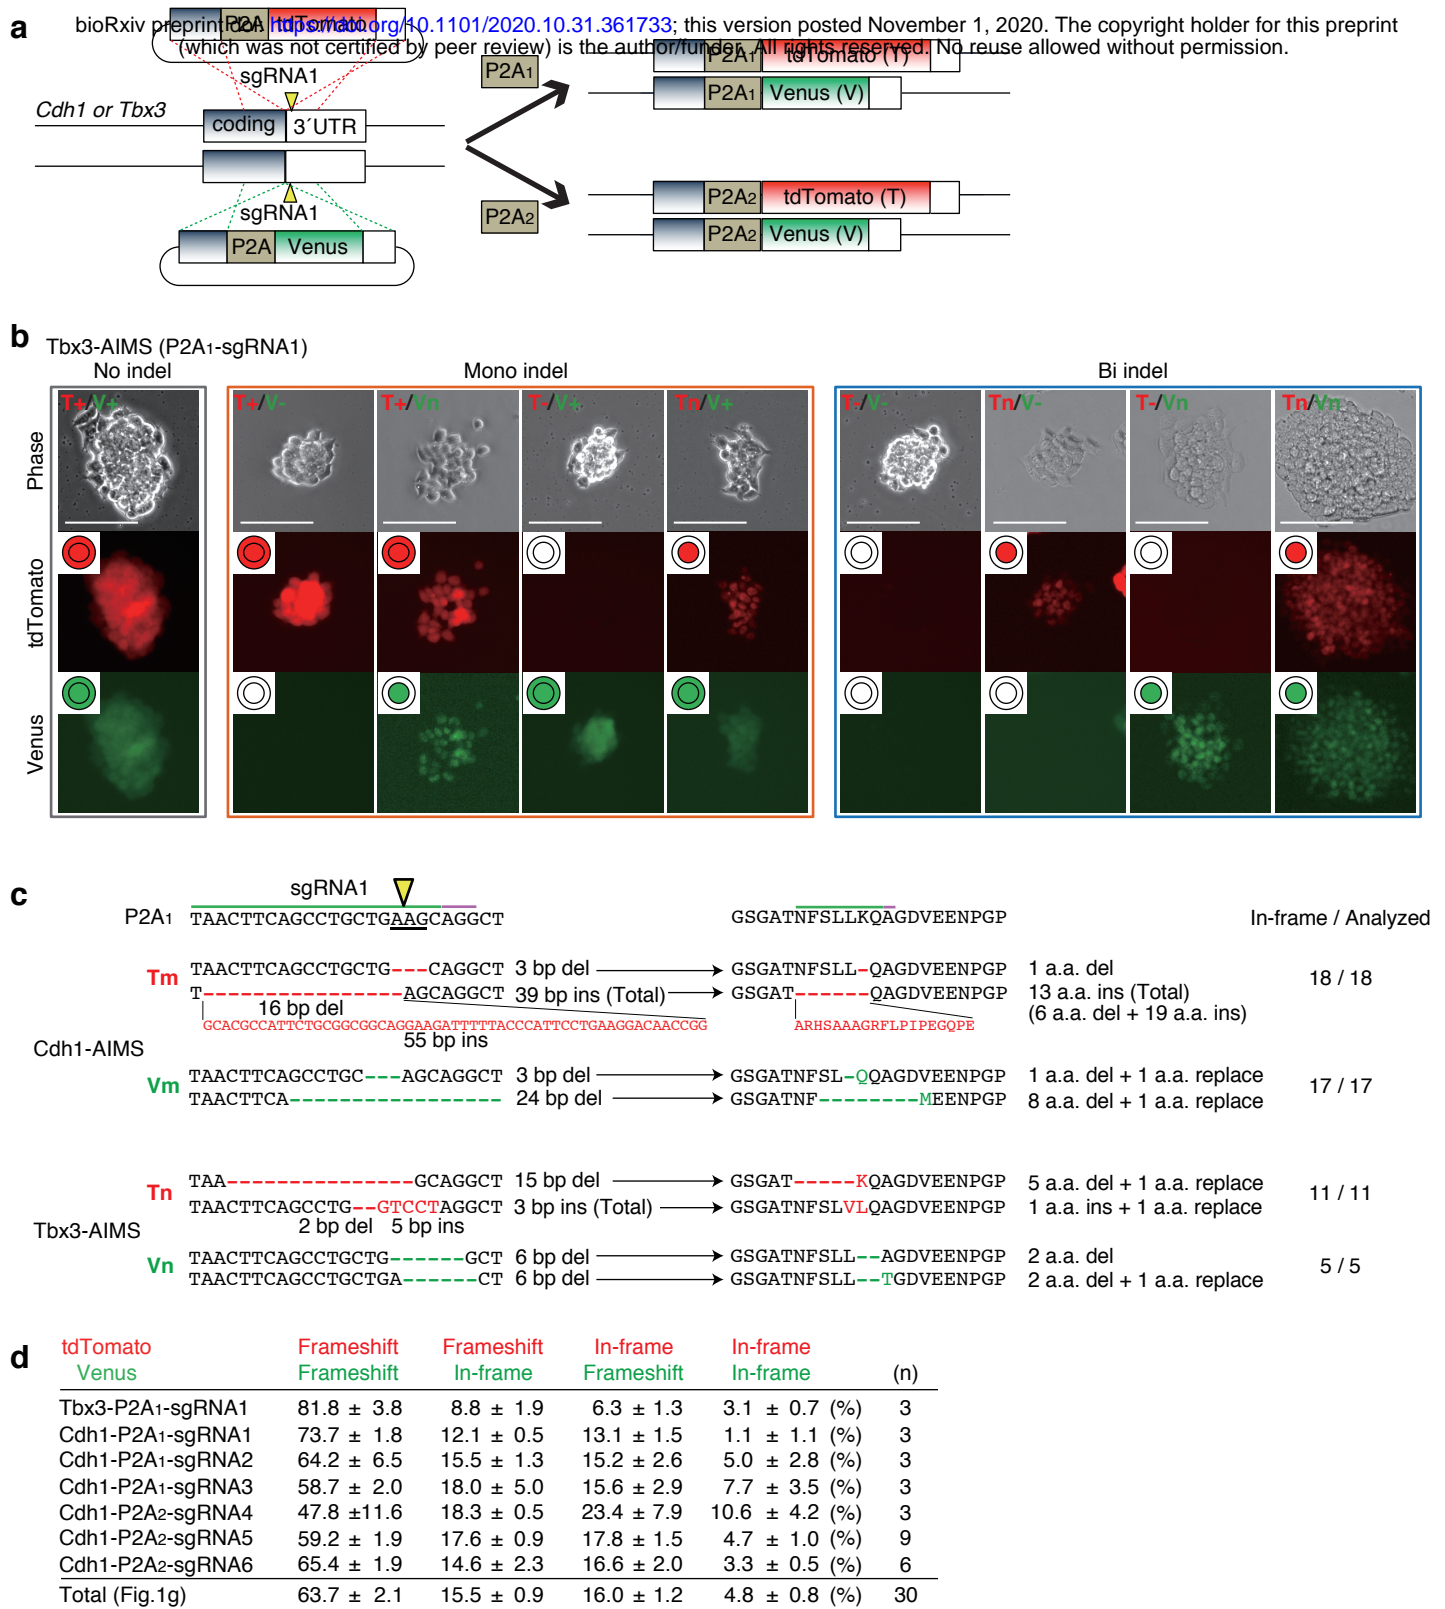

Extended Data Fig. 1. AIMS construction and indel analysis.

**a**, Schematic of generating dual color KI mESC clones for AIMS. Two types of targeting plasmids are simultaneously knocked into the two alleles of the *Cdh1* or *Tbx3* locus using CRISPR-Cas9. Arrowheads indicate DSB sites. **b**, Representative results of Tbx3-P2A1-AIMS. Genotypes are determined by nine combinations of tdTomato/Venus expression and localization in Tbx3-P2A1-AIMS. T, tdTomato; V, Venus; +, no indel represented by both cytosolic and nuclear localization; n, in-frame indel represented by nuclear localization; -, frameshift indel or large deletion represented by loss of fluorescence. Scale bar indicates 100 μm. **c**, Representative DNA and amino acid sequences of in-frame indels. The clones showing cytosolic expression (T+ or V+) are sequenced and the number of clones with in-frame indel are shown. **d**, The table shows percentages of the four types of bi-allelic indel patterns. Total indicates the mean of all data ( $n = 30$ ), which is shown in Fig. 1g. Data are shown as mean ± s.e.m..

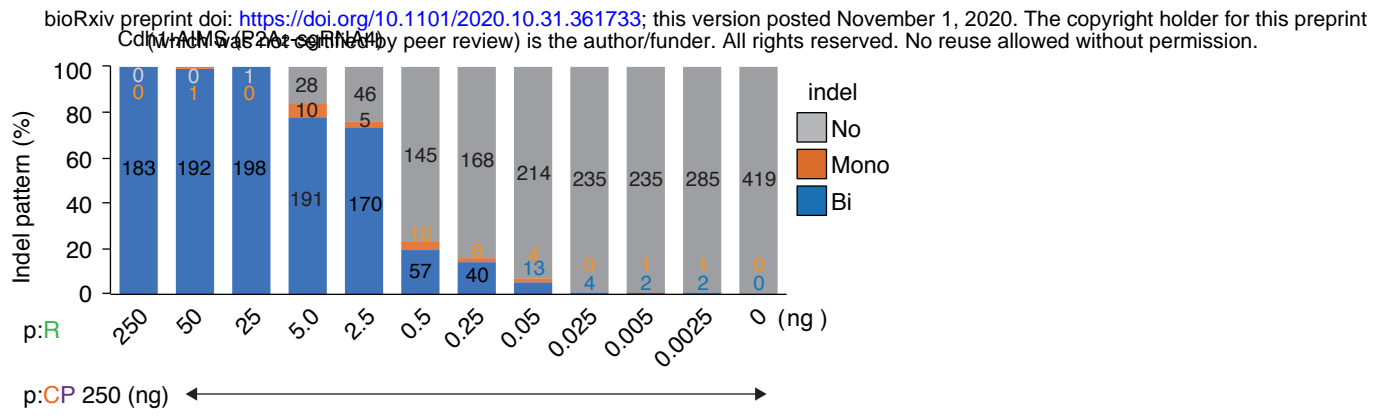

**Extended Data Fig. 2. A minor effect of plasmid reduction on mono-allelic indel induction.**

Indel pattern is analyzed using Cdh1-P2A2-AIMS. The spacerless-PX459 plasmid (p:CP, 250 ng) is co-transfected with different amounts of the P2A2-sgRNA4 sgRNA expression plasmid (p:R). Data are shown as mean  $\pm$  s.e.m. from  $n = 3$  independent experiments performed at different times and total colony number analyzed is shown in each column.

bioRxiv preprint doi: <https://doi.org/10.1101/2020.10.31.361733>; this version posted November 1, 2020. The copyright holder for this preprint (which was not certified by peer review) is the author/funder. All rights reserved. No reuse allowed without permission.

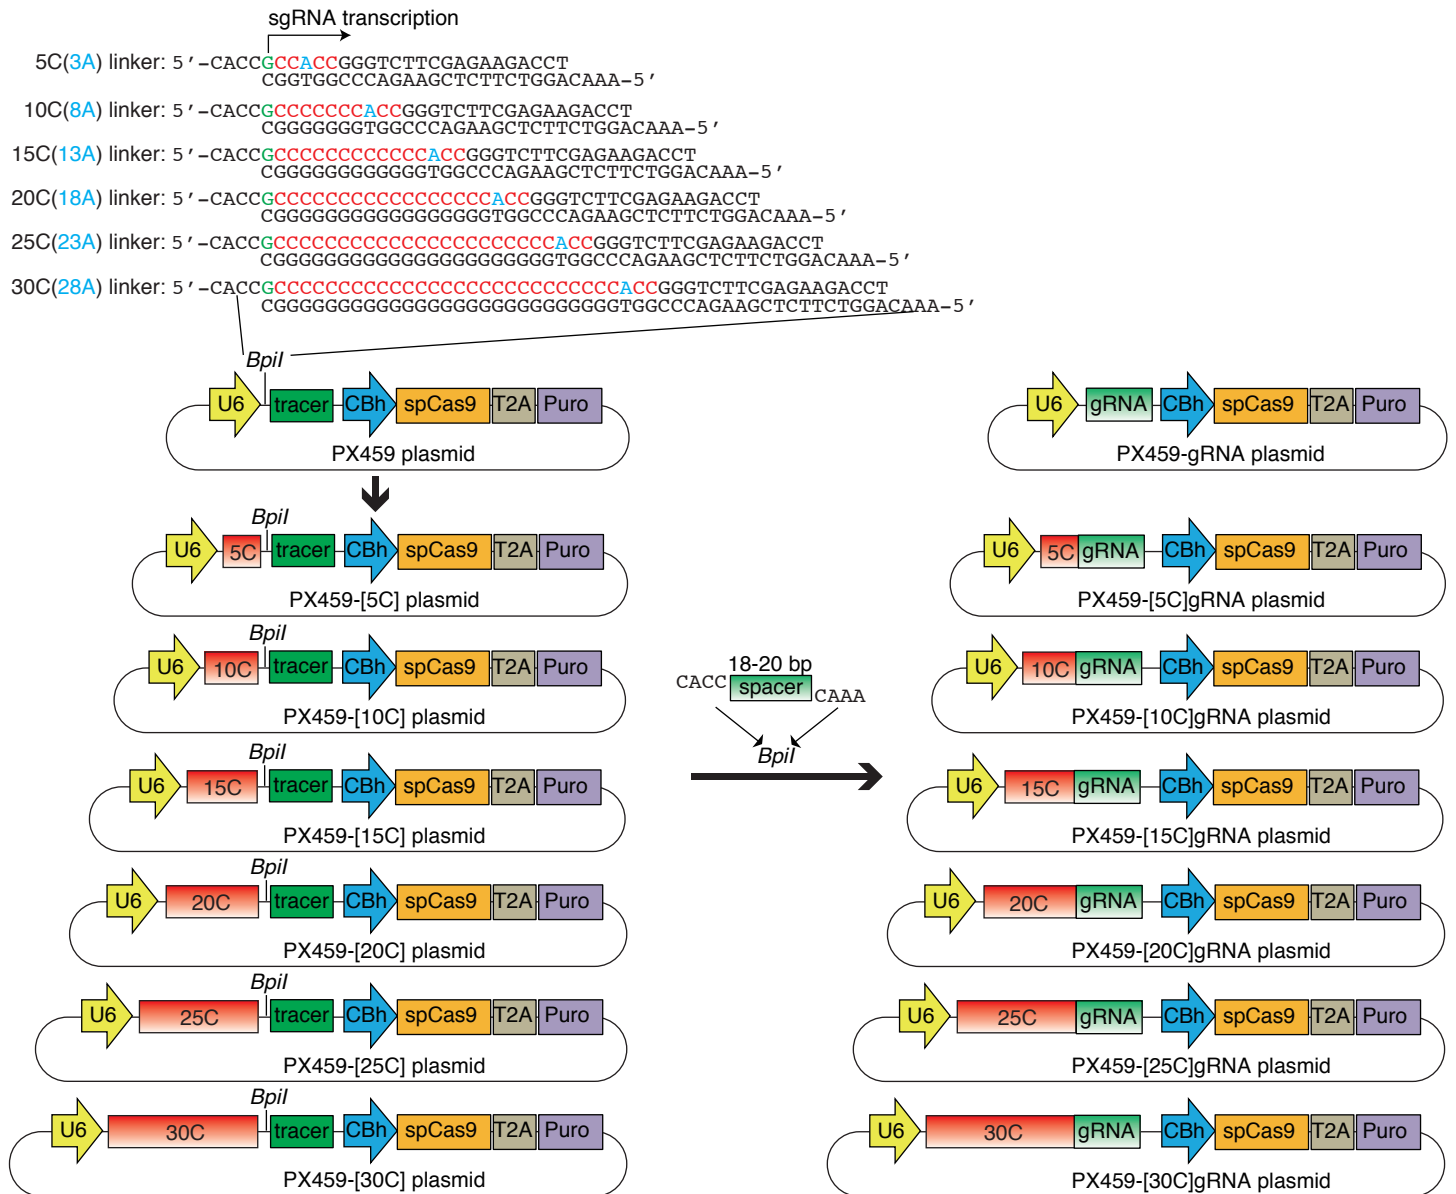

**Extended Data Fig. 3. Construction of [0C]-[30C]sgRNA expressing all-in-one plasmids.**

The linkers are inserted into the *BspI* site of the PX459 plasmid. Adenine (A, blue) is inserted at the third position from the 3' end of the cytosine extension to create an overhang sequence for insertion of spacer sequences with CCAC overhang. The [5C]-[30C]sgRNA-expressing all-in-one plasmids can be produced by inserting a standard 18-20 bp spacer linker between two *BspI* sites.

a bioRxiv preprint doi: <https://doi.org/10.1101/2020.10.31.361733>; this version posted November 1, 2020. The copyright holder for this preprint (which was not certified by peer review) is the author/funder. All rights reserved. No reuse allowed without permission.

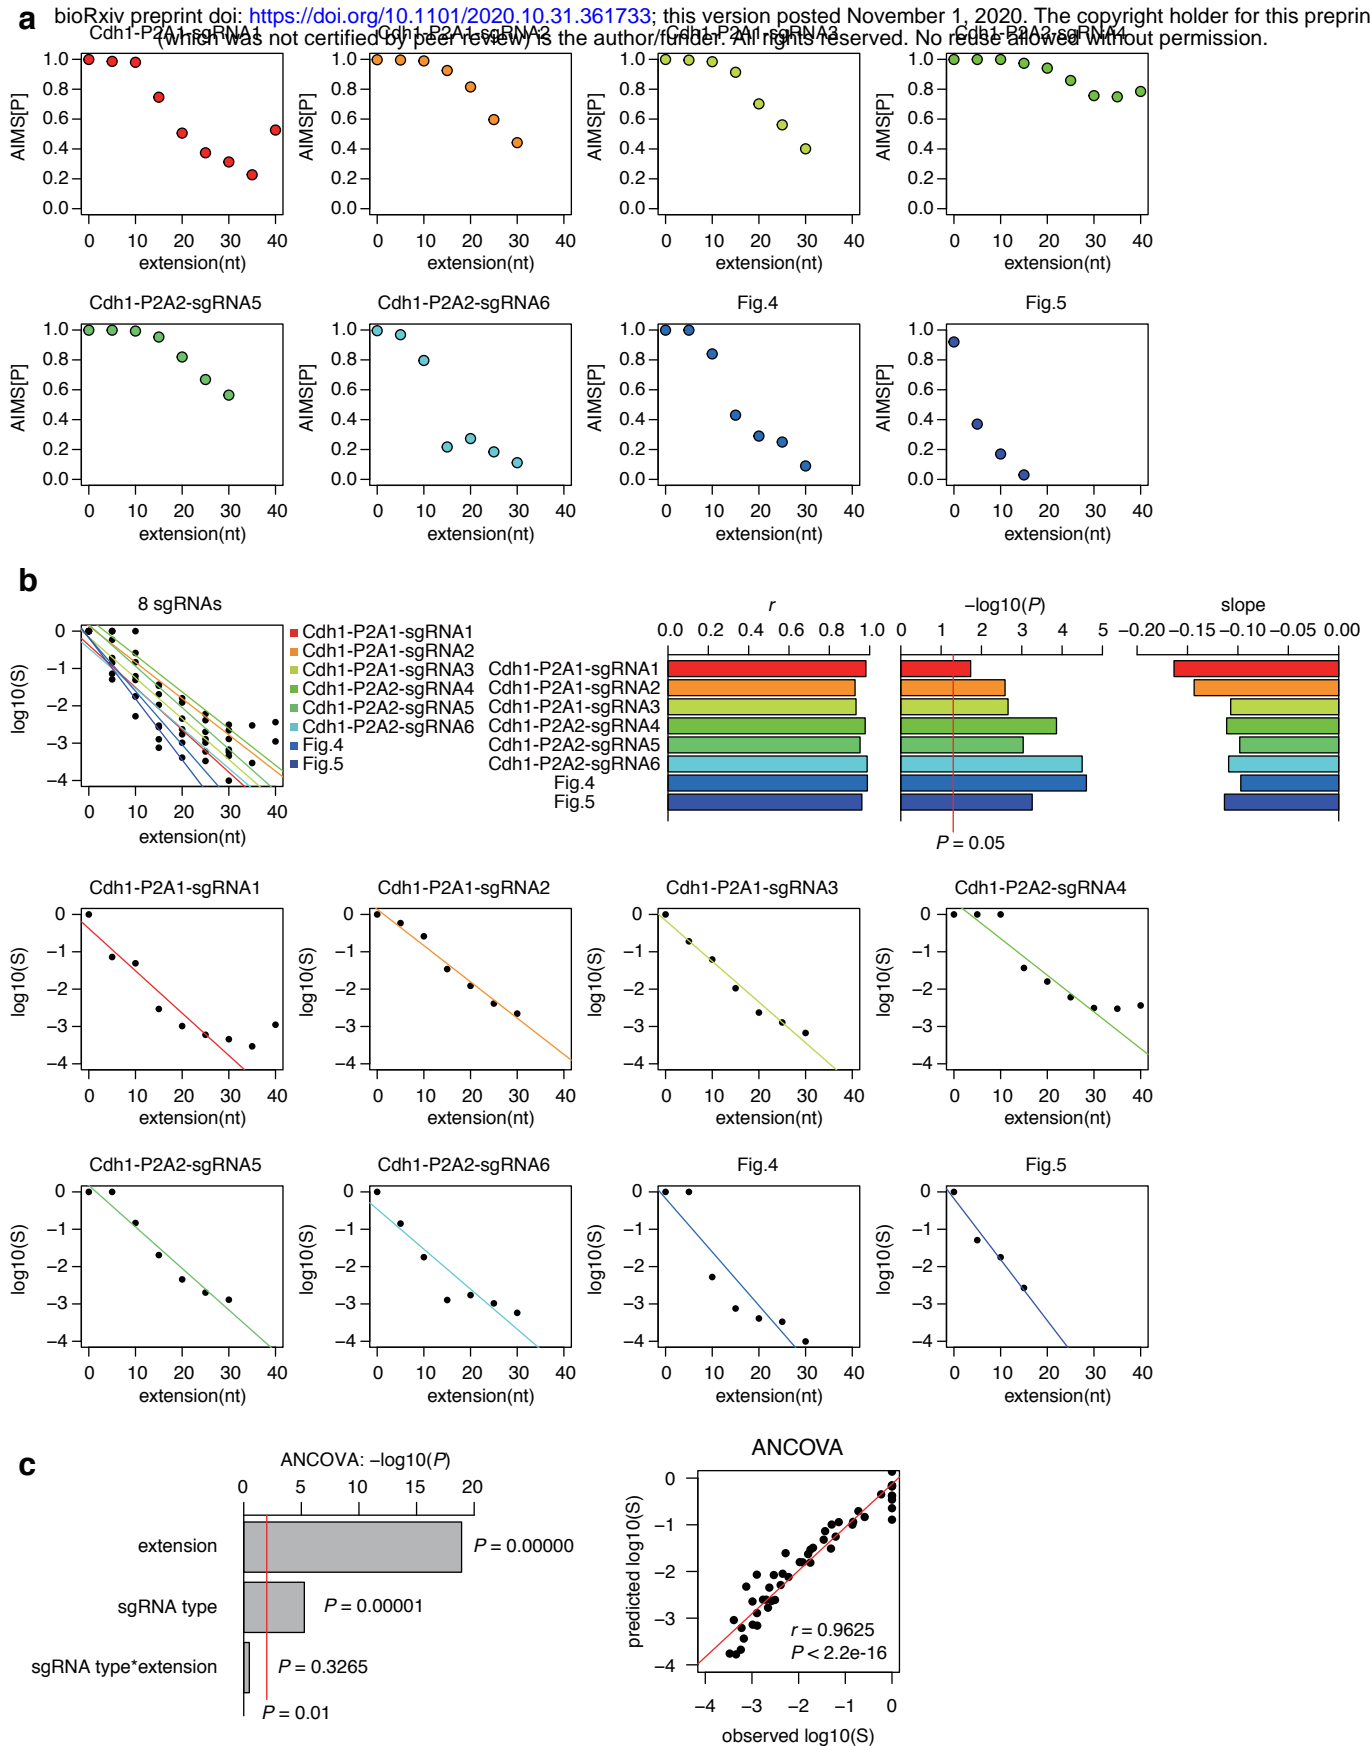

Extended Data Fig. 4. Quantitative assessment of the suppressive effects of [C] extension for different sgRNAs.

**a**, Relationships between [C] extension length and AIMS[P] are shown for 8 sgRNA. **b**, Relationships between [C] extension length and concentration of effective sgRNA-Cas9 complex ( $\log_{10}(S)$ ) are shown. The three upper right panels show the results of linear regression analysis, including Pearson's correlation coefficients ( $r$ ), P-values, and slopes. The upper left panels and 8 bottom panels show the correlation between [C] extension length and  $\log_{10}(S)$  for all sgRNAs (overlaid) and each sgRNA, respectively. Note that 8 sgRNAs have similar slope values, suggesting uniform effects of [C] extension. **c**, ANCOVA (analysis of covariance) analysis to investigate the differences of slope values for 8 sgRNAs. Statistical results for each source of variance are shown in left. Right panel shows a correlation between observed and predicted  $\log_{10}(S)$ . Linear regression and Pearson's correlation coefficient ( $r$ ) with P-value are shown.



**a**

|                  | tdTomato<br>Venus | Indel (+)<br>Indel (-) | Indel (-)<br>Indel (+) | (n) |
|------------------|-------------------|------------------------|------------------------|-----|
| Tbx3-P2A1-sgRNA1 | 46.9 ± 3.6        | 53.1 ± 3.6 (%)         | 46.6 (%)               | 12  |
| Cdh1-P2A1-sgRNA1 | 53.7 ± 3.2        | 46.3 ± 3.2 (%)         | 46.3 (%)               | 17  |
| Cdh1-P2A1-sgRNA2 | 53.0 ± 5.2        | 47.0 ± 5.2 (%)         | 47.0 (%)               | 8   |
| Cdh1-P2A1-sgRNA3 | 47.4 ± 5.4        | 52.6 ± 5.4 (%)         | 52.6 (%)               | 9   |
| Cdh1-P2A2-sgRNA4 | 45.2 ± 4.7        | 54.8 ± 4.7 (%)         | 54.8 (%)               | 7   |
| Cdh1-P2A2-sgRNA5 | 44.2 ± 5.0        | 55.8 ± 5.9 (%)         | 55.8 (%)               | 9   |
| Cdh1-P2A2-sgRNA6 | 44.6 ± 4.5        | 55.4 ± 4.5 (%)         | 55.4 (%)               | 11  |
| Total (Fig. 2e)  | 48.3 ± 1.6        | 51.7 ± 1.6 (%)         | 51.7 (%)               | 73  |

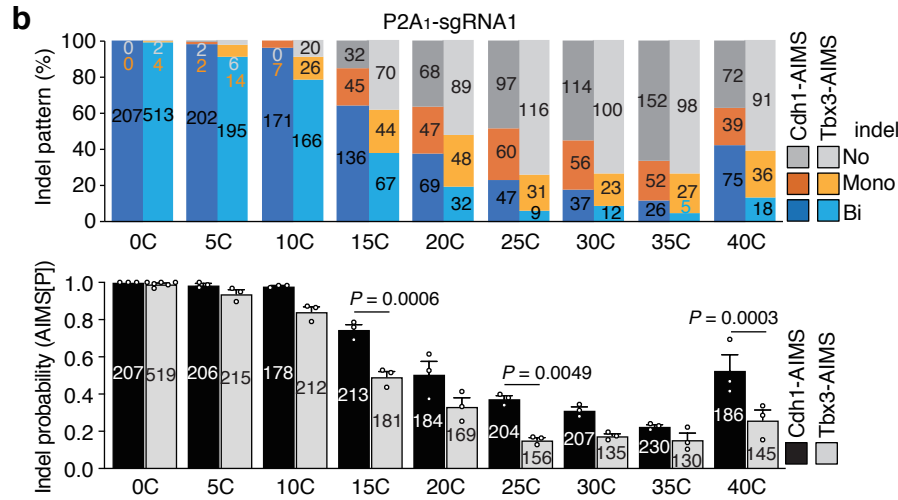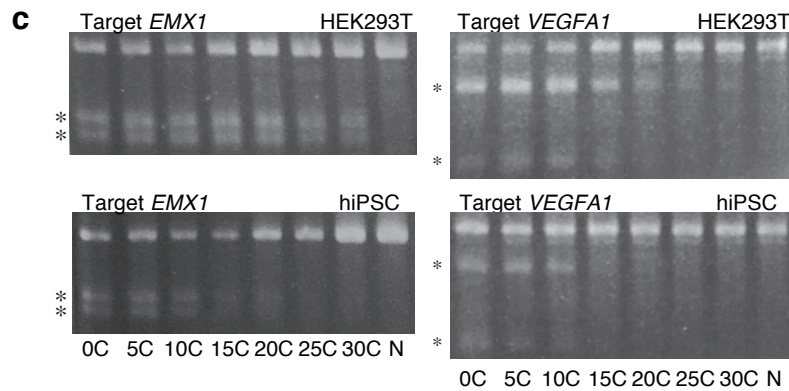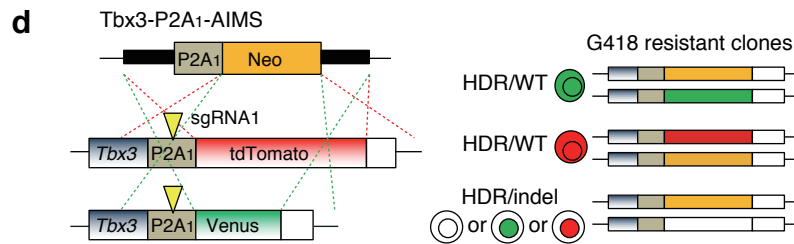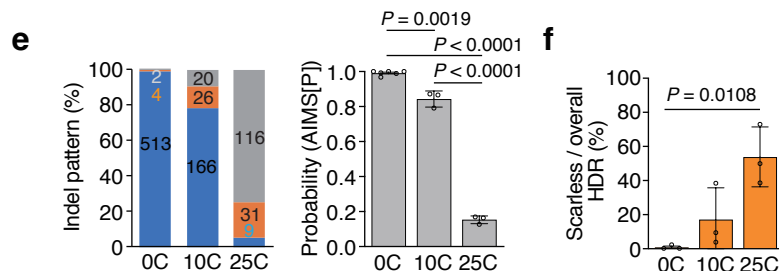

**Extended Data Fig. 5. Additional results of AIMS experiments.**

**a**, The table shows percentages of the two types of mono-allelic indel patterns. Total indicates the mean of all data ( $n = 73$ ), which is shown in the Fig. 2e. Data are shown as mean  $\pm$  s.e.m.. **b**, Different indel frequency at different chromosomal loci. Indel patterns and probabilities (AIMS[P]) are compared between Cdh1-P2A1-AIMS and Tbx3-P2A1-AIMS. The data for the indel pattern of Cdh1-AIMS (P2A1-sgRNA1) were from Fig. 2d. Data are shown as mean  $\pm$  s.e.m. from  $n = 3$  (0C in Tbx3-AIMS,  $n = 6$ ) independent experiments performed at different times and total colony number is shown in each column. Statistical significance is assessed using two-way ANOVA and post hoc Tukey–Kramer test. **c**, Comparison of indel probability between HEK293T cells and hiPSCs. Asterisks indicate PCR products digested by the T7E1 assay. N, PX459 plasmid without spacer. **d**, Schematic of measuring the frequency of scarless mono-allelic HDR without indels on the non-HDR allele using Tbx3-P2A1-AIMS. Arrowheads indicate DSB sites. **e**, Indel pattern (left) and probability (AIMS[P], right) are shown. The data of the indel pattern of Tbx3-AIMS (P2A1-sgRNA1) are from Extended Data Fig. 5b. Data are shown as mean  $\pm$  s.e.m. from  $n = 3$  independent experiments performed at different times and total colony number is shown in each column. Statistical significance is assessed using one-way ANOVA and post hoc Tukey–Kramer test. **f**, Frequencies of scarless HDR are shown as mean  $\pm$  s.e.m. from  $n = 3$  independent experiments performed at different times. Statistical significance is assessed using one-way ANOVA and post hoc Tukey–Kramer test.

bioRxiv preprint doi: <https://doi.org/10.1101/2020.10.31.361733>; this version posted November 1, 2020. The copyright holder for this preprint (which was not certified by peer review) is the author/funder. All rights reserved. No reuse allowed without permission.

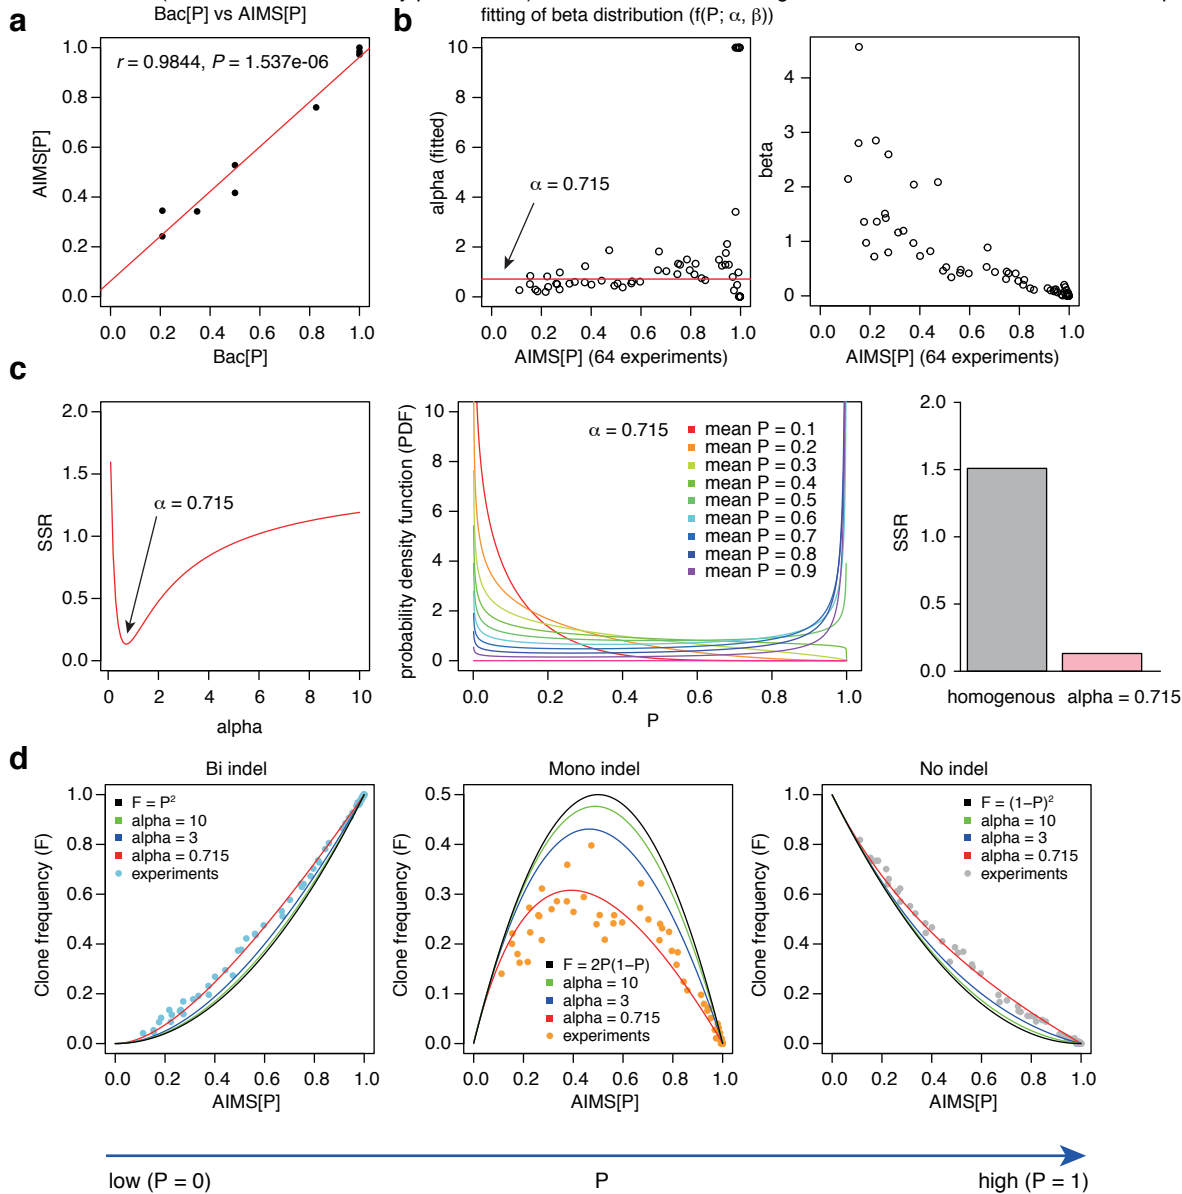

**Extended Data Fig. 6. Computational modeling of single-cell heterogeneity of genome editing frequency using beta distribution.**

**a**, Correlation between Bac[P] and AIMS[P] shown in Fig. 3e. Linear regression and Pearson's correlation coefficient ( $r$ ) with P-value are shown. **b**,  $\alpha$  and  $\beta$  values of beta distribution for each experiment that minimized sum of squared residuals (SSR) between experimental  $F(\text{Bi})$ ,  $F(\text{Mono})$ , and  $F(\text{No})$  and simulated  $F(\text{Bi})$ ,  $F(\text{Mono})$ , and  $F(\text{No})$ . **c**, Identification of fixed  $\alpha$  value that minimized SSR (left). Probability density functions with different mean  $P$  are shown in a middle panel. Right panel shows comparison of SSR based on the assumption that single-cell editing probability is homogenous or heterogeneous. **d**, Correlation between the experimental data and prediction of clone frequency for bi-, mono-, or no-indel. Black line is based on the assumption that genome editing probability is homogenous across the cell population. For the beta distribution, additional simulations in the case that  $\alpha$  is 3 or 10 are also exhibited.

bioRxiv preprint doi: <https://doi.org/10.1101/2020.10.31.361733>; this version posted November 1, 2020. The copyright holder for this preprint (which was not certified by peer review) is the author/funder. All rights reserved. No reuse allowed without permission.

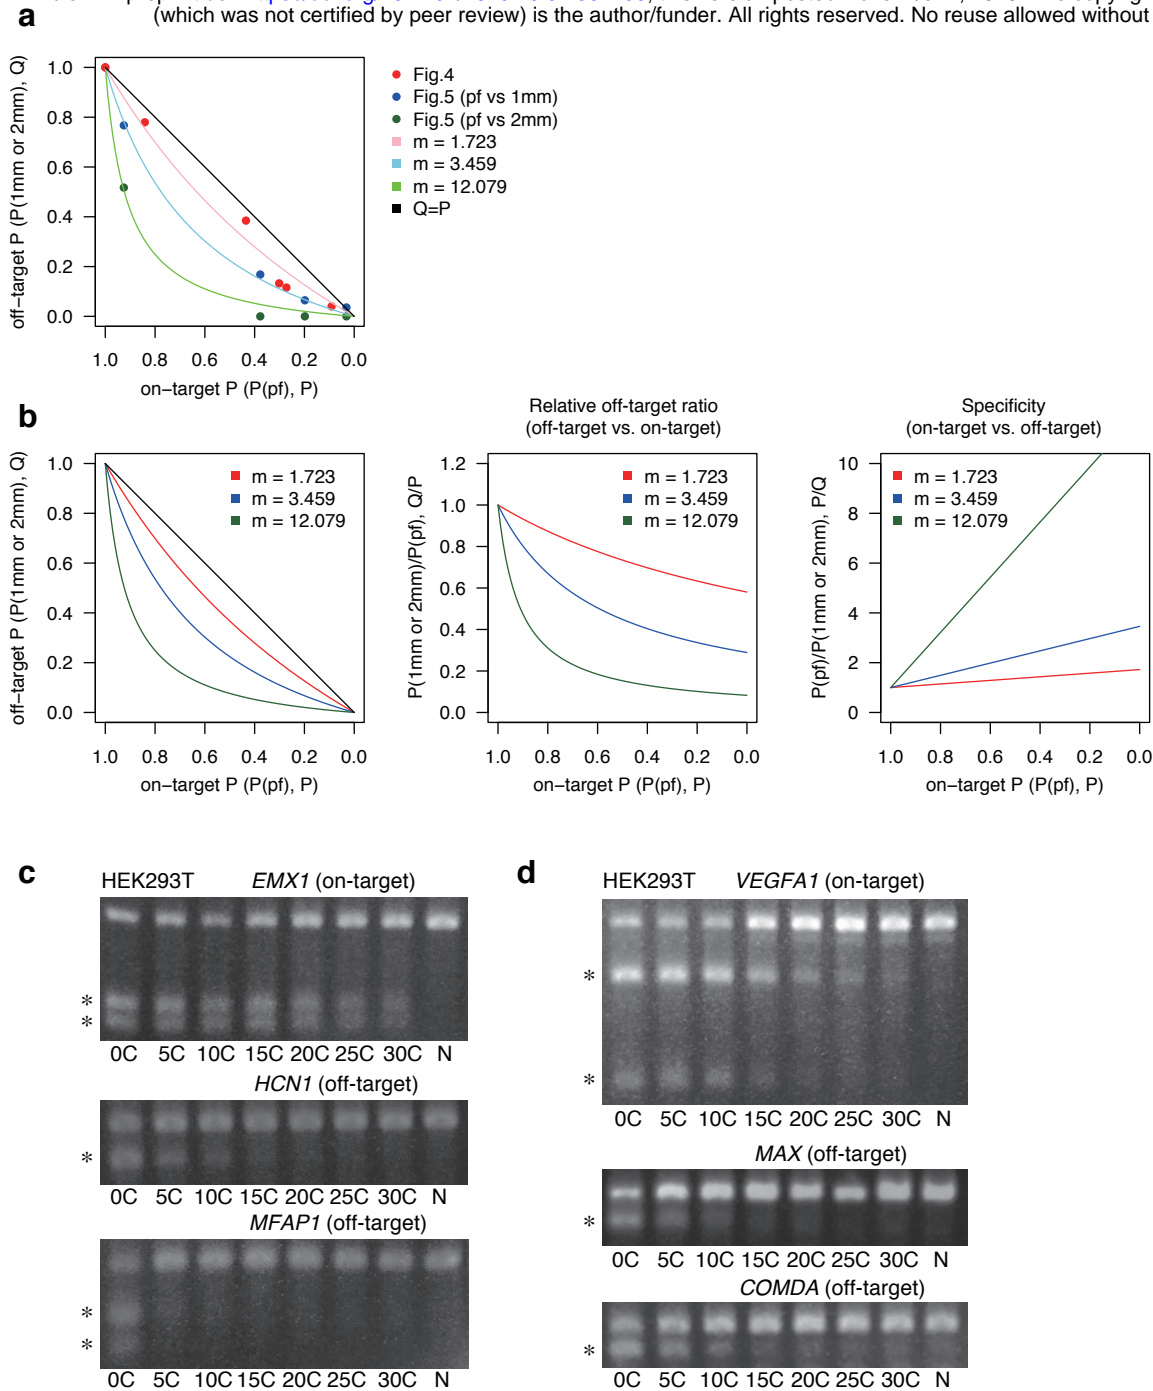

**Extended Data Fig. 7. Downsizing sgRNA-Cas9 activity enhances on-target specificity and suppresses off-target effects.**

**a**, Relationships between on-target editing probability on perfect match target (P) and off-target probability on 1mm or 2mm target (Q) shown in Fig. 4c and Fig. 5c. Results of computational fitting are also shown. Red, blue, and green dots indicate experimental data from Fig. 4c, Fig. 5c (pf vs 1mm), and Fig. 5c (pf vs 2mm), respectively. Details of generating simulation curves are described in Methods. **b**, Computational analysis of decrease in relative off-target editing and increase in on-targeting specificity along with reduction in indel probability. pf, perfect match; 1mm, 1 bp mismatch; 2mm, 2 bp mismatch. **c**, **d**, Indel probability of other sgRNAs in HEK293T cells. The T7E1 assay is performed to investigate on-target and off-target indel probability for *EMX1* (**c**) and *VEGFA1* (**d**) targeting sgRNAs.

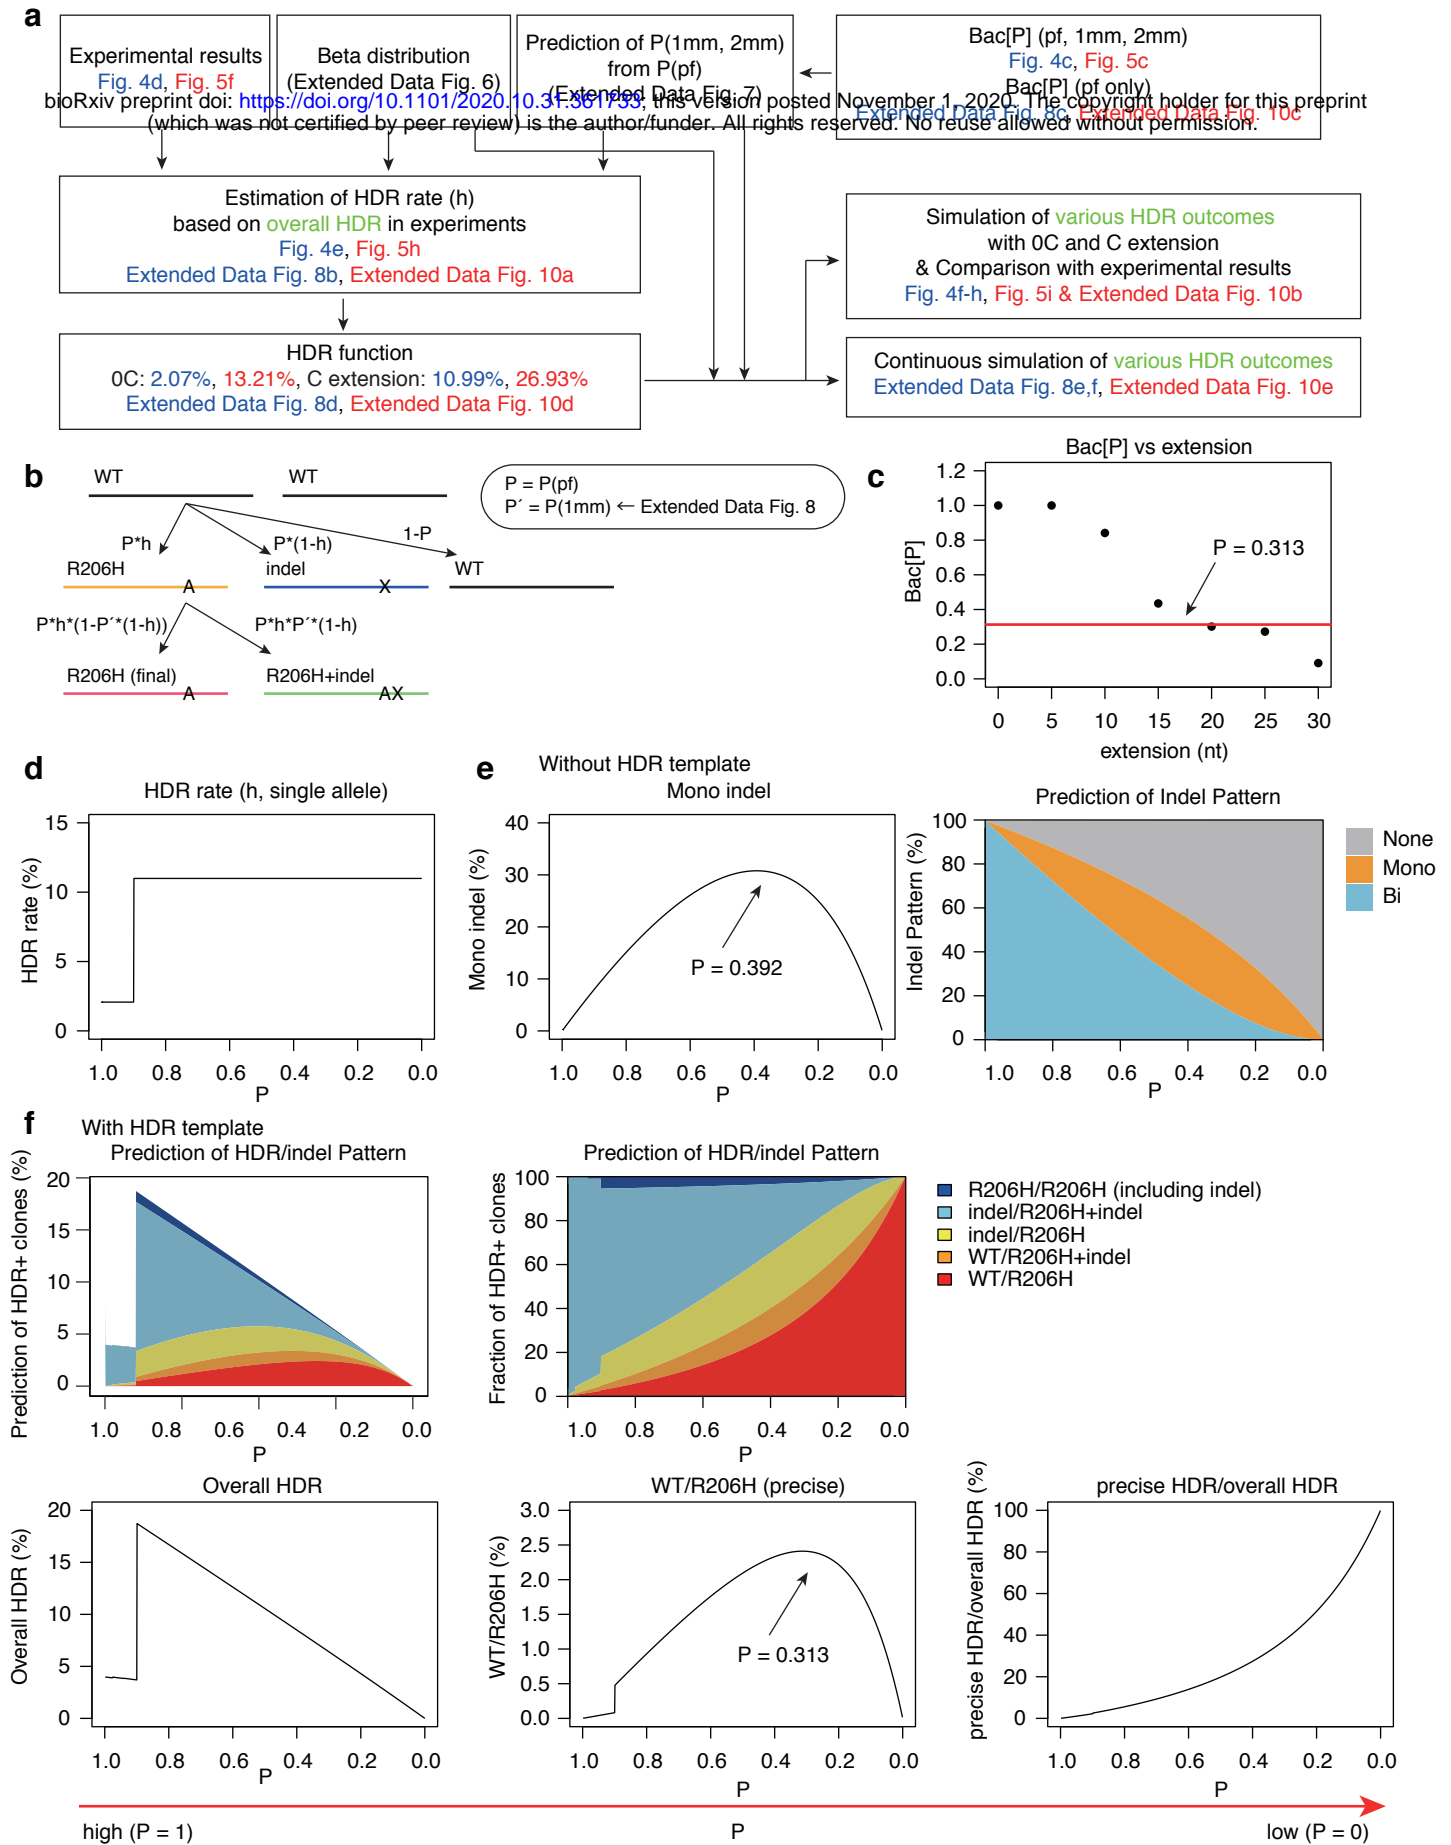

**Extended Data Fig. 8. Computational simulation of precise mono-allelic HDR from homozygous states.**

**a**, A flow chart to establish a computational simulation of precise mono-allelic HDR to generate FOP model in mESC (Fig. 4 and Extended Data Fig. 8) or to correct a SNP in FOP hiPSCs (Fig. 5 and Extended Data Fig. 10). **b**, Scheme of HDR-mediated generation of FOP model (WT/R206H) from a WT/WT genotype. **c**, Relationship between [C] extension length and Bac[P] shown in Fig. 4c. A red line (P = 0.313) indicates the value when precise WT/R206H HDR is induced at the highest level. **d**, Hypothetical function of HDR rate (h) along indel probability (P). HDR rate is set based on the data of Fig. 4e (see details in Methods). **e**, Simulation of editing outcomes in the absence of HDR templates. Left and right panels show the relationships between indel probability (P) and frequencies for mono-allelic indel (left) or No/Mono/Bi indel (right). An arrow indicates the predicted maximum value for mono-allelic indel induction with P value of 0.392. **f**, Simulation of editing outcomes in the presence of HDR templates. Top panels show the relationships between indel probability (P) and frequencies of various HDR clones (top, left) and relative fraction (top, right). Frequencies of overall HDR and precise WT/R206H editing and the relative ratio of the WT/R206H clones (vs overall HDR) are shown in bottom panels. An arrow indicates the predicted maximum value (P = 0.313) to generate precise WT/R206H HDR clones.

bioRxiv preprint doi: <https://doi.org/10.1101/2020.10.31.361733>; this version posted November 1, 2020. The copyright holder for this preprint (which was not certified by peer review) is the author/funder. All rights reserved. No reuse allowed without permission.

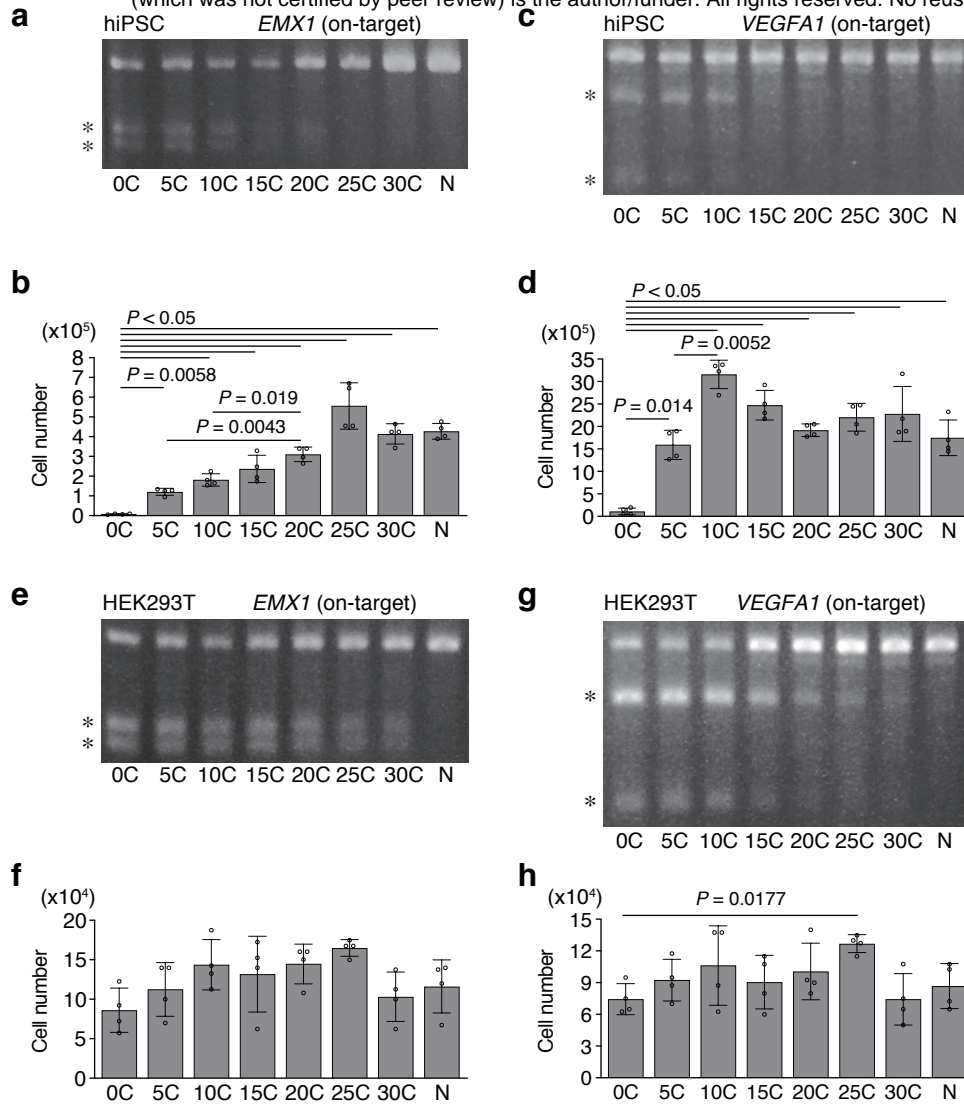

Extended Data Fig. 9. Suppression of cytotoxicity by [C] extension in hiPSCs.

**a-d**, Indel probability (**a, c**) and cytotoxicity (**b, d**) of other sgRNAs are investigated in hiPSCs. The T7E1 assay is performed to investigate on-target indel probability for sgRNAs targeting *EMX1* (**a**) and *VEGFA1* (**c**). These pictures are also shown in the Extended Data Fig 5c. **e-h**, Indel probability (**e, g**) and cytotoxicity (**f, h**) are investigated in HEK293T cells. The T7E1 assay is demonstrated to investigate on-target and off-target indel probability for sgRNAs targeting *EMX1* (**e**) and *VEGFA1* (**g**). These pictures are also shown in the Extended Data Fig 7c, d. N, PX459 plasmid without spacer (**a-h**). Asterisks indicate PCR products digested by the T7E1 assay (**a, c, e, g**). Statistical significance is assessed using Welch's test with post hoc Games–Howell test (**b, d, f, h**).

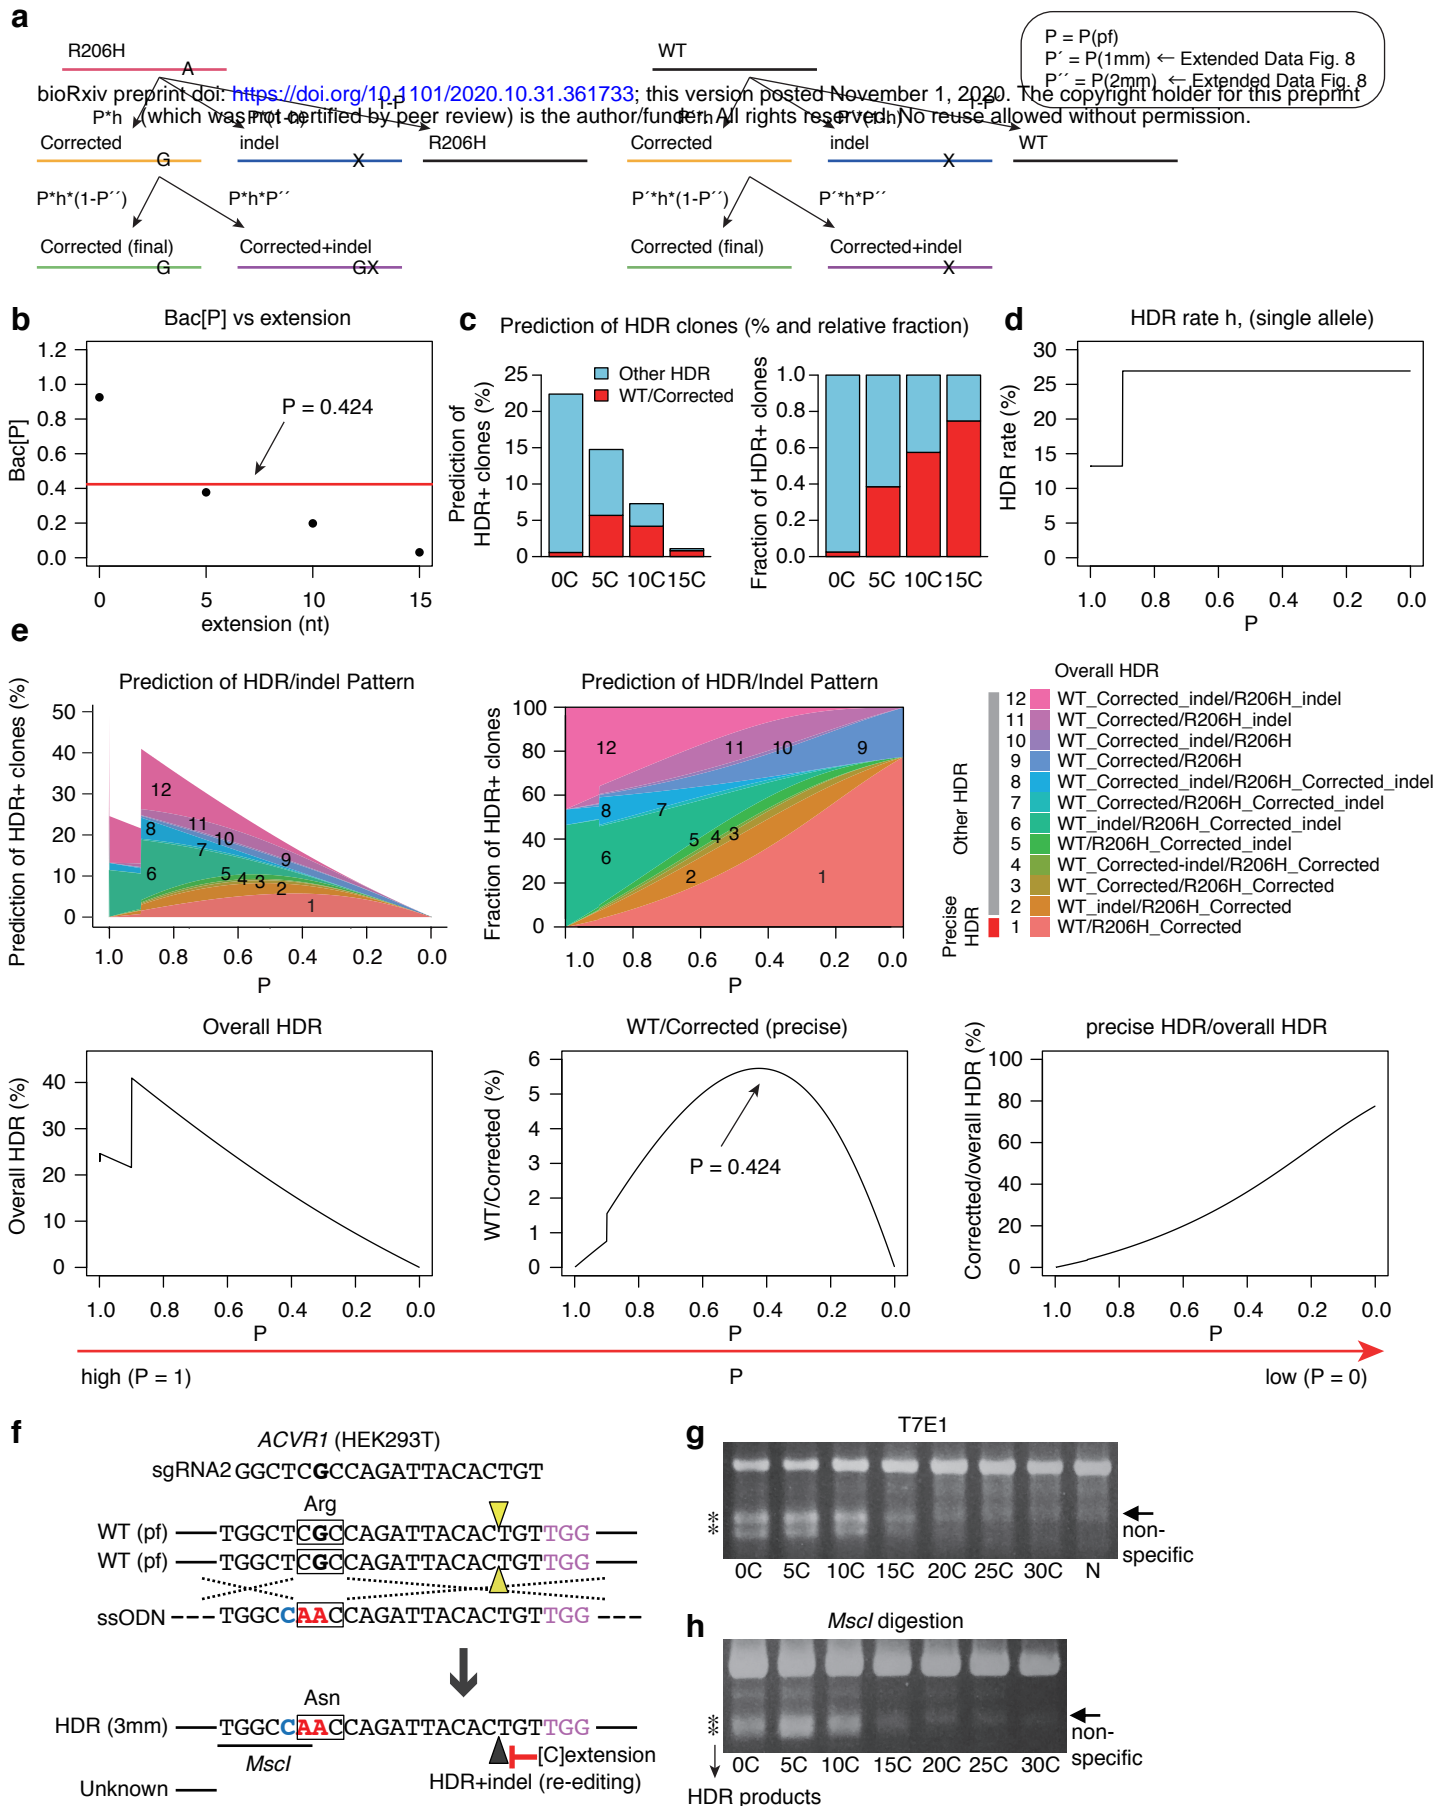

**Extended Data Fig. 10. Computational simulation of precise disease gene correction.**

**a**, Scheme of HDR-mediated correction of FOP model (WT/R206H) to a WT/Corrected genotype. **b**, Relationship between [C] extension length and Bac[P] for R206H allele, shown in Fig. 5c. A red line ( $P = 0.424$ ) indicates the value when precise WT/Corrected HDR is induced at the highest level. **c**, Prediction of precise WT/Corrected clones and other HDR clones (left) and relative fraction (right). **d**, Hypothetical function of HDR rate ( $h$ ) along indel probability ( $P$ ). HDR rate is set based on the data of Fig. 5h (see details in Methods). **e**, Simulation of a relationship between indel probability ( $P$ ) and various HDR outcomes (top, left) and relative fraction (top, right). Frequencies of overall HDR and WT/Corrected HDR and the relative ratio of the WT/Corrected clones (vs overall HDR) are shown in bottom panels. An arrow indicates the predicted maximum value ( $P = 0.424$ ) to generate precise WT/Corrected HDR clones. **f-h**, Measuring HDR frequency in HEK293T cells. Schematic of HDR for 3 bp substitution in exon 5 of *ACVR1* (**f**). Silent mutation with cytosine (C, blue) and missense mutations with two adenines (AA, red) creates a *MscI* restriction enzyme site, which allows for rapid quantification of HDR frequency. Squares indicate codon. pf, perfect match; 3mm, 3 bp mismatches. Arrowheads indicate DSB sites. Asterisks indicate PCR products digested by T7E1 (**g**) or digested by *MscI* restriction enzyme (**h**). N, PX459 plasmid without spacer.
